1 **Autophagy is required in macrophages and dendritic cells to prevent early recruitment of neutrophils**  
2 **during *Mycobacterium tuberculosis* infection**

3 Rachel L. Kinsella\*, Jacqueline M. Kimmey#, Asya Smirnov, Reilly Woodson, Margaret R. Gaggioli, Sthefany  
4 M. Chavez, Darren Kreamalmeyer, Christina L. Stallings\*

5 Department of Molecular Microbiology, Center for Women's Infectious Disease Research, Washington  
6 University School of Medicine, St. Louis, MO 63110, USA

7 #Current address: Department of Microbiology and Environmental Toxicology, UC Santa Cruz, Santa Cruz, CA,  
8 USA

9 \*Correspondence:

10 Rachel L. Kinsella: [rlkinsella@wustl.edu](mailto:rlkinsella@wustl.edu), 314-286-0277

11 Christina L. Stallings: [stallings@wustl.edu](mailto:stallings@wustl.edu), 314-286-0276

12 **Keywords:** autophagy, *Mycobacterium tuberculosis*, macrophage, dendritic cells, neutrophils, inflammation,  
13 T<sub>H</sub>17

14 **Running title:** Autophagy prevents neutrophil accumulation during infection

15 ¶This work was supported by NIH grants R01 AI132697 and U19 AI142784, a Burroughs Wellcome Fund  
16 Investigators in the Pathogenesis of Infectious Disease Award, and the Philip and Sima Needleman Center for  
17 Autophagy Therapeutics and Research to C.L.S., a Potts Memorial Foundation postdoctoral fellowship to R.L.K.,  
18 and a National Science Foundation Graduate Research Fellowship DGE-1143954 and the NIGMS Cell and  
19 Molecular Biology Training Grant GM007067 to J.M.K.

20

21

22

23 **ABSTRACT**

24 The immune response to *Mycobacterium tuberculosis* infection determines tuberculosis disease outcomes, yet we  
25 have an incomplete understanding of what immune factors contribute to a protective immune response.  
26 Neutrophilic inflammation has been associated with poor disease prognosis in humans and in animal models  
27 during *M. tuberculosis* infection and, therefore, must be tightly regulated. ATG5 is an essential autophagy protein  
28 that is required in innate immune cells to control neutrophil-dominated inflammation and promote survival during  
29 *M. tuberculosis* infection, however, the mechanistic basis for how ATG5 regulates neutrophil recruitment is  
30 unknown. To interrogate what innate immune cells require ATG5 to control neutrophil recruitment during *M.*  
31 *tuberculosis* infection, we used different mouse strains that conditionally delete *Atg5* in specific cell types. We  
32 found that ATG5 is required in CD11c<sup>+</sup> cells (lung macrophages and dendritic cells) to control the production of  
33 proinflammatory cytokines and chemokines during *M. tuberculosis* infection, which would otherwise promote  
34 neutrophil recruitment. This role for ATG5 is autophagy-dependent, but independent of mitophagy, LC3-  
35 associated phagocytosis, and inflammasome activation, which are the most well-characterized ways that  
36 autophagy proteins regulate inflammation. In addition to the increase in proinflammatory cytokine production  
37 during *M. tuberculosis* infection, loss of ATG5 in innate immune cells also results in an early induction of T<sub>H</sub>17  
38 responses. These findings reveal new roles for autophagy proteins in lung resident macrophages and dendritic  
39 cells that are required to suppress inflammatory responses that are associated with poor control of *M. tuberculosis*  
40 infection.

41

42

43

44

45

## 46 INTRODUCTION

47 According to the World Health Organization, 10 million people fell ill with *Mycobacterium tuberculosis* infection  
48 and 1.5 million people died of tuberculosis (TB) in 2020, marking the first increase in TB-associated deaths in  
49 over a decade(1). Whether a person controls the initial *M. tuberculosis* infection or develops active TB disease is  
50 directly impacted by the type of immune response elicited in the infected individual(2). Therefore, better  
51 understanding of what constitutes a protective versus non-protective immune response to *M. tuberculosis*  
52 infection is critical for developing better therapies and prevention measures to fight this deadly disease. Genetic  
53 mouse models have provided invaluable insight into the immunological processes that are required for control of  
54 *M. tuberculosis* infection. Infection of mice through the aerosol route leads to phagocytosis of *M. tuberculosis* by  
55 alveolar macrophages, initiating an inflammatory response and recruitment of innate immune cells to the lung(2).  
56 *M. tuberculosis* replicates within these innate immune cells until antigen specific T cells traffic to the lung where  
57 they activate the innate immune cells to restrain *M. tuberculosis* replication and suppress inflammation. *M.*  
58 *tuberculosis* establishes a chronic infection in wild-type (WT) mice, which can survive for over a year with this  
59 infection.

60 *Atg5<sup>fl/fl</sup>-LysM-Cre* mice, which delete the *Atg5* gene specifically in macrophages, inflammatory  
61 monocytes, some dendritic cells (DCs), and neutrophils, are severely susceptible to *M. tuberculosis* infection(3–  
62 5), highlighting ATG5 as a critical component of a protective immune response to *M. tuberculosis*. *M.*  
63 *tuberculosis* infected *Atg5<sup>fl/fl</sup>-LysM-Cre* mice fail to control bacterial replication and succumb to infection by 40  
64 days post-infection (dpi)(3–5). The uncontrolled *M. tuberculosis* replication is associated with an early (by 14  
65 dpi) and sustained influx of neutrophils to the lungs of the infected *Atg5<sup>fl/fl</sup>-LysM-Cre* mice. Depletion of  
66 neutrophils during *M. tuberculosis* infection in *Atg5<sup>fl/fl</sup>-LysM-Cre* mice extends their survival(3), demonstrating  
67 that the neutrophil-dominated inflammation contributed to their susceptibility. In general, higher abundances of  
68 neutrophils during *M. tuberculosis* infection have been associated with worse disease outcomes in mice (6–13)  
69 and humans (12, 14–17). Therefore, understanding the regulatory mechanisms that govern neutrophil recruitment

70 and accumulation during *M. tuberculosis* infection could be key for manipulating inflammatory responses to  
71 better control TB.

72 ATG5 is required for the intracellular pathway of autophagy, a process by which cytoplasmic contents are  
73 targeted to the lysosome for degradation(18, 19). Initiation of autophagy involves phagophore formation from the  
74 endoplasmic reticulum, which is mediated by the ULK1 complex (ULK1/ULK2, ATG13, FIP200, ATG101) and  
75 the PI3 kinase complex (ATG14L, BECLIN1, VPS15, and VPS34)(20, 21). Elongation of the autophagosomal  
76 double membrane depends on two ubiquitin-like conjugation systems. In the first system, ATG12 is activated by  
77 ATG7, transferred to ATG10, and covalently attached to ATG5. The second ubiquitin-like component is LC3  
78 (microtubule-associated protein 1 light chain 3), which is conjugated to phosphatidylethanolamine, generating  
79 the membrane bound form called LC3-II through the actions of ATG7 and ATG3. ATG5-ATG12 facilitates LC3  
80 lipidation through its interactions with ATG3, while ATG16L1 specifies the localization of LC3 conjugation to  
81 the autophagosome membrane(18, 19, 21, 22). The autophagosome membrane is then completed and targeted for  
82 fusion with the lysosome, where the autophagosome cargo are degraded. However, ATG5 also functions outside  
83 of autophagy, including during *M. tuberculosis* infection(3), although these activities remain poorly understood.  
84 The mechanistic basis for how loss of ATG5 results in early and exaggerated recruitment of neutrophils during *M.*  
85 *tuberculosis* infection and whether this activity for ATG5 involves autophagy remains unknown.

86 In this manuscript, we dissect the role for ATG5 in regulating neutrophil recruitment and accumulation  
87 during *M. tuberculosis* infection. We find that ATG5 functions with other autophagy proteins in CD11c<sup>+</sup> lung  
88 macrophages and DCs to limit proinflammatory responses that otherwise promote neutrophil influx to the lung  
89 early in *M. tuberculosis* infection. In addition, ATG5 is required in lung macrophages and DCs to limit IL-17A  
90 production from CD4<sup>+</sup> T cells. Therefore, our studies reveal new roles for ATG5 and other autophagy proteins in  
91 regulating inflammatory responses during infection, which with further dissection could provide insight into  
92 pathways that may be targeted to effectively promote protective immune responses during TB.

## 95 MATERIALS AND METHODS

### 96 Mice

97 All flox mice (*Atg5<sup>fl/fl</sup>*, *Atg16l1<sup>fl/fl</sup>*, *Becn1<sup>fl/fl</sup>*) used in this study have been described previously (3, 23, 24) and  
98 colonies are maintained in an enhanced barrier facility. LysM-Cre (Jax #004781), Cd11c-Cre (Jax #007567),  
99 Mrp8-Cre (Jax #021614) from the Jackson Laboratory were crossed to specific flox mice. *Il17a-IRES-GFP-KI*  
100 (Jax # 018472) reporter mice were bred to *Atg5<sup>fl/fl</sup>-LysM-Cre* and *Atg5<sup>fl/fl</sup>* mice to generate the *Il17a-GFP/Atg5<sup>fl/fl</sup>-*  
101 *LysM-Cre* and *Il17a-GFP/Atg5<sup>fl/fl</sup>* lines. *Rubicon<sup>-/-</sup>* (Jax # 032581) mice were provided by Drs. Douglas Green  
102 and Jennifer Martinez (25). Caspase 1/11<sup>-/-</sup> (Jax #016621) were bred to *Atg5<sup>fl/fl</sup>-LysM-Cre* and *Becn1<sup>fl/fl</sup>-LysM-*  
103 *Cre* mice. *Parkin<sup>-/-</sup>* (Jax # 006582)(26), *Pink1<sup>-/-</sup>* (Jax # 017946)(27) and WT control mice were provided by Dr.  
104 Jonathan Brestoff at Washington University School of Medicine. Male and female littermates (aged 6-12 weeks)  
105 were used and were subject to randomization. A minimum of 3 mice were used per experiment and each  
106 experiment was performed twice. Statistical consideration was not used to determine mouse sample sizes. The  
107 mice were housed and bred at Washington University in St. Louis in specific pathogen-free conditions in  
108 accordance with federal and university guidelines, and protocols were approved by the Animal Studies Committee  
109 of Washington University.

110

### 111 Infection of mice with *M. tuberculosis* and measurement of bacterial burden in the lungs

112 *M. tuberculosis* Erdman expressing GFP (10, 28) was used in all experiments except experiments with the *Il-17a-*  
113 *GFP/Atg5<sup>fl/fl</sup>-LysM-Cre* reporter mice when WT Erdman was used. *M. tuberculosis* was cultured at 37°C in 7H9  
114 (broth) or 7H11 (agar) (Difco) medium supplemented with 10% oleic acid/albumin/dextrose/catalase (OADC),  
115 0.5% glycerol, and 0.05% Tween 80 (broth). Cultures of GFP expressing *M. tuberculosis* were grown in the  
116 presence of kanamycin (20µg/mL) to ensure plasmid retention. *M. tuberculosis* cultures in logarithmic growth  
117 phase (OD600 = 0.5–0.8) were washed with PBS + 0.05% Tween-80, sonicated to disperse clumps, and diluted  
118 in sterile water before delivering 100 CFUs of aerosolized *M. tuberculosis* per lung using an Inhalation Exposure  
119 System (Glas-Col). Within 2 hours of each infection, lungs were harvested from at least two control mice,

120 homogenized, and plated on 7H11 agar to determine the input CFU dose. At 14 dpi, *M. tuberculosis* titers were  
121 determined by homogenizing the superior, middle, and inferior lobes of the right lung and plating serial dilutions  
122 on 7H11 agar. Colonies were counted after 3 weeks of incubation at 37°C in 5% CO<sub>2</sub>.

123

#### 124 Flow cytometry from infected lungs

125 Lungs were perfused with sterile PBS and digested for 1 hour with 625µg/mL collagenase D (Roche  
126 11088875103) and 75U/mL DNase I (Sigma D4527). Cells were quenched with PBS + 2% heat-inactivated (HI)-  
127 FBS, + 2mM EDTA and passed through a 70µM filter. Cells were suspended in PBS + 2% HI-FBS + 2mM EDTA  
128 in the presence of Fc receptor blocking antibody (BioLegend, 101302) and stained with antibodies at a 1:200  
129 dilution against the following mouse markers: CD11b\_BV605 or PerCP-Cy5.5 (clone M1/70), CD45\_AF700  
130 (BioLegend, 103259), Ly6G\_PE-Cy7 or AF647 (clone 1A8), MHCII\_Spark blue 550 (BioLegend, 107662),  
131 CD62L\_Pe/Cy5 (BioLegend, 104410), CD44\_BV510 (BioLegend, 103044), CD11c\_PerCP (BioLegend,  
132 117325), Ly6C\_BV605 (BioLegend, 128036), CD4\_BV570 (clone RM4-5), TCRb\_BV421 (clone H57-597),  
133 CD19\_Pacific blue (Zombie-NIR (Biolegend, 423105), CD64\_PerCP-eFluor 710 (eBiosciences, 46061482) and  
134 Mertk\_PE/Cy7 (eBiosciences, 25575182). Cells were stained for 20 minutes at 4°C and then fixed in 4%  
135 paraformaldehyde (Electron Microscope Sciences) for 20 minutes at room temperature. Flow cytometry was  
136 performed on an LSR-Fortessa (BD Bioscience) or an Aurora (Cytek Biosciences, with 4 laser 16V-14B-10YG-  
137 8R configuration) and analyzed using FlowJo software (Tree Star). Absolute cell counts were determined using  
138 Precision count beads (BioLegend) or volumetric-based counting on the Aurora. Gating strategies to identify  
139 neutrophils, CD4<sup>+</sup> T cells and IL-17-GFP<sup>+</sup> CD4<sup>+</sup> T cells are in Supplementary Figure 1.

140

#### 141 Culturing and infection of bone marrow derived macrophages (BMDMs)

142 BMDMs were generated by flushing femurs and tibias of mice and culturing the cells in DMEM, 20% HI-FBS,  
143 10% supernatant from 3T3 cells overexpressing M-CSF + 1% MEM non-essential amino acids (Cellgro 25-025-  
144 CI), 2mM L-glutamine, 100U/mL penicillin and 100µg/mL streptomycin (Sigma P4333) at 37°C in 5% CO<sub>2</sub> in

145 non-TC treated plates. After 6 days non-adherent cells were removed and  $1 \times 10^6$  adherent macrophages were  
146 seeded per well in 6 well non-TC treated plates in DMEM, 10% HI-FBS, 1% MEM non-essential amino acids  
147 and 2 mM L-glutamine. BMDMs were rested overnight at 37°C in 5% CO<sub>2</sub>. *M. tuberculosis* was grown to an OD  
148 of 0.6-0.8, washed with PBS twice, sonicated to disperse clumps, centrifuged at 55xg for 10 minutes to remove  
149 clumps and resuspended in antibiotic-free BMDM media. Macrophages were infected at an MOI of 10 by  
150 centrifuging the cells at 200xg for 10 minutes. BMDMs were washed with PBS twice to remove unbound *M.*  
151 *tuberculosis* and fresh BMDM media was added to each well. Cells were incubated at 37°C and 5% CO<sub>2</sub> for 24  
152 hours. To determine CFU counts, the cells were lysed with 0.05% triton X-100, serially diluted, and plated onto  
153 7H11 agar and incubated for 21 days when bacterial colonies were counted. At 24 hours post-infection (hpi)  
154 supernatants were stored at -80°C for cytokine analysis.

155

#### 156 Cytokine analysis

157 BMDM supernatants were filtered through a 0.22 µm filter twice to remove *M. tuberculosis* and analyzed using  
158 the BioPlex-Pro Mouse Cytokine 23-Plex Immunoassay (Bio-Rad) as per the manufacturer's instructions.  
159 ELISAs were performed according to the manufacturer's instructions (R&D systems): KC/CXCL1 (DY453), IL-  
160 6 (DY406) and G-CSF (DY414).

161

#### 162 IL-17A blocking and T cell depletion

163 To neutralize IL-17A, 100µg of InVivo monoclonal anti-IL-17A (Bio X Cell, BE0173) neutralizing antibody was  
164 administered to *Atg5<sup>fl/fl</sup>* and *Atg5<sup>fl/fl</sup>-LysM-Cre* mice by intraperitoneal (i.p.) injection every other day starting at  
165 1 day prior to infection, with the final dose delivered at 13 dpi, similar to published protocols (29). Control mice  
166 received 100µg of IgG from mouse serum (Sigma, I5381) by i.p. injection every other day starting 1 day prior to  
167 infection and finishing on 13 dpi. To deplete CD4<sup>+</sup> T cells from mice, 250µg of anti-mouse CD4 (Leinco  
168 Technologies, C1333) was administered by i.p. injection at 2 days prior to infection, 5 dpi and 12 dpi. Control  
169 mice received 250µg of IgG from rat serum (Sigma, 18015) i.p. on 2 days prior to infection, 5 dpi and 12 dpi.

170

171 Data and statistics

172 All experiments were performed at least twice. When shown, multiple samples represent biological (not technical)  
173 replicates of mice randomly sorted into each experimental group. No blinding was performed during animal  
174 experiments. Animals were only excluded when pathology unrelated to *M. tuberculosis* infection was present (i.e.  
175 bad teeth leading to weight loss). Determination of statistical differences was performed with Prism (GraphPad  
176 Software, Inc.) using log-rank Mantel-Cox test (survival), unpaired two-tailed t-test (to compare two groups with  
177 similar variances), or one-way ANOVA with Šídák Multiple Comparison test (to compare more than two groups).  
178 When used, center values and error bars represent the mean +/- S.E.M. In all figures, all significant differences  
179 are indicated by asterisks: \*  $P < 0.05$ , \*\*  $P < 0.01$ , \*\*\*  $P < 0.001$ , \*\*\*\*  $P < 0.0001$ . Non-significant comparisons of  
180 particular interest are noted as n.s. (not significant).

181

182

183

184

185

186

187

188

189

190

191

192

193

194



## RESULTS

### ATG5 is required in CD11c<sup>+</sup> lung macrophages and DCs to control neutrophil recruitment and accumulation early during *M. tuberculosis* infection *in vivo*.

*M. tuberculosis* infection of *Atg5<sup>fl/fl</sup>-LysM-Cre* mice results in the recruitment of a higher number of neutrophils in the lungs at 14 dpi as compared to *Atg5<sup>fl/fl</sup>* controls, despite equivalent bacterial burdens at this time point (3). This indicates that the neutrophils are accumulating due to a defect in inflammatory responses to infection and not due to higher burden. There are also no differences in the abundance of other cell types in *Atg5<sup>fl/fl</sup>-LysM-Cre* and *Atg5<sup>fl/fl</sup>* mice at 14 dpi (3). To determine which LysM<sup>+</sup> cells required ATG5 to control the early influx of neutrophils into the lungs during *M. tuberculosis* infection, we compared bacterial burdens and neutrophil inflammation in *Atg5<sup>fl/fl</sup>-LysM-Cre*, *Atg5<sup>fl/fl</sup>-Mrp8-Cre* (deletion in neutrophils), *Atg5<sup>fl/fl</sup>-Cd11c-Cre* (deletion in lung resident macrophages and DCs), and *Atg5<sup>fl/fl</sup>* controls at 14 dpi. At 14 dpi, the *Atg5<sup>fl/fl</sup>-LysM-Cre* and *Atg5<sup>fl/fl</sup>-Cd11c-Cre* mice, but not *Atg5<sup>fl/fl</sup>-Mrp8-Cre* mice, had higher levels of neutrophil inflammation in the lungs as compared to *Atg5<sup>fl/fl</sup>* controls (**Fig. 1A and B**). The degree of increased neutrophil frequency was similar in *Atg5<sup>fl/fl</sup>-LysM-Cre* and *Atg5<sup>fl/fl</sup>-Cd11c-Cre* mice, demonstrating that loss of *Atg5* in CD11c<sup>+</sup> cells, but not neutrophils, leads to the early influx of neutrophils into the lungs during *M. tuberculosis* infection. At 14 dpi, none of the mouse strains harbored increased *M. tuberculosis* burden in their lungs (**Fig. 1C**), indicating that the increase in neutrophil abundance in *Atg5<sup>fl/fl</sup>-Cd11c-Cre* mice is not due to elevated bacterial burden and reflects a dysregulated inflammatory response to infection.

The higher levels of neutrophils in the lungs of *Atg5<sup>fl/fl</sup>-LysM-Cre* and *Atg5<sup>fl/fl</sup>-Cd11c-Cre* mice were sustained through 21dpi (**Fig. 1D**). However, only *Atg5<sup>fl/fl</sup>-LysM-Cre* mice, and not *Atg5<sup>fl/fl</sup>-Cd11c-Cre* mice, had higher bacterial burdens in the lungs at 21 dpi (**Fig. 1E**), similar to previously reported (3). Loss of *Atg5* in neutrophils results in increased susceptibility to *M. tuberculosis* infection in some, but not all, *Atg5<sup>fl/fl</sup>-Mrp8-Cre* mice (3). The susceptible *Atg5<sup>fl/fl</sup>-Mrp8-Cre* mice accumulate higher neutrophil numbers and bacterial burdens in their lungs at 21 dpi (**Fig. 1D and E**)(3). Therefore, loss of *Atg5* in neutrophils is likely contributing to the higher burdens in the lungs of *Atg5<sup>fl/fl</sup>-LysM-Cre* mice at 21 dpi. These data indicate that ATG5 has a role in CD11c<sup>+</sup>

220 lung macrophages and DCs to regulate early recruitment of neutrophils, but not the control of *M. tuberculosis*  
221 replication at 14 and 21 dpi.

222 To determine how the loss of Atg5 in CD11c<sup>+</sup> cells and the resulting early influx of neutrophils into the  
223 lungs affected host susceptibility, we monitored survival in *M. tuberculosis* infected *Atg5<sup>fl/fl</sup>-Cd11c-Cre* mice as  
224 compared to *Atg5<sup>fl/fl</sup>* controls. *Atg5<sup>fl/fl</sup>-Cd11c-Cre* mice succumbed to *M. tuberculosis* infection between 100 and  
225 150 dpi, which was significantly earlier than *Atg5<sup>fl/fl</sup>* controls (median survival time of 259 dpi) (**Fig. 1F**), but not  
226 as early as *Atg5<sup>fl/fl</sup>-LysM-Cre* mice (succumb 30-40 dpi (3)). These data demonstrate that ATG5 is required in  
227 CD11c<sup>+</sup> lung macrophages and DCs to control early neutrophil recruitment and promote survival following *M.*  
228 *tuberculosis* infection.

229

230 **The role for ATG5 in macrophages and DCs in regulating neutrophil recruitment is dependent on other**  
231 **autophagy proteins.**

232 We previously showed that at least one role for ATG5 in innate immune cells to control *M. tuberculosis* infection  
233 is autophagy-independent (3). To determine whether the regulation of neutrophil recruitment by ATG5 in CD11c<sup>+</sup>  
234 lung macrophages and DCs was dependent on other autophagy proteins or represented the autophagy-independent  
235 role for ATG5 during *M. tuberculosis* infection, we monitored neutrophil abundance in the lungs of mice lacking  
236 expression of another essential autophagy protein, BECLIN 1, in CD11c<sup>+</sup> cells (*Becn1<sup>fl/fl</sup>-Cd11c-Cre*) at 14 dpi  
237 by flow cytometry. Similar to *Atg5<sup>fl/fl</sup>-Cd11c-Cre* mice, *Becn1<sup>fl/fl</sup>-Cd11c-Cre* mice also exhibited elevated  
238 neutrophil frequency in the lung at 14 dpi relative to *Becn1<sup>fl/fl</sup>* control mice (**Fig. 2A**), despite no difference in  
239 bacterial burden (**Fig. 2B**). In addition, analysis of *M. tuberculosis* infected *Atg16l1<sup>fl/fl</sup>-LysM-Cre* and *Becn1<sup>fl/fl</sup>-*  
240 *LysM-Cre* mice also revealed higher levels of neutrophils in the lungs at 14 dpi relative to controls, without higher  
241 bacterial burdens (**Fig. 2C and D**).

242 In addition to their role in canonical autophagy, the proteins ATG5, BECLIN 1, and ATG16L1 are also  
243 required for the process of LC3 associated phagocytosis (LAP), where LC3 is recruited to the phagosome,  
244 resulting in LC3<sup>+</sup> single membrane vesicles that traffic to the lysosome for degradation. LAP can dampen

245 inflammatory responses through efferocytosis, pathogen removal, stimulating inhibitory immune-receptor  
246 signaling, and reducing auto-antigen levels (30–32). In contrast to canonical autophagy, LAP uses RUBICON  
247 and UVRAG instead of ATG14 in the PI3K complex and does not depend on ULK1 (30, 33, 34). To distinguish  
248 between whether ATG5, BECLIN 1, and ATG16L1 were functioning through autophagy or LAP to regulate  
249 neutrophil recruitment during *M. tuberculosis* infection, we infected mice lacking RUBICON expression, a  
250 protein specifically required for LAP. *Rubicon*<sup>-/-</sup> mice had no difference in neutrophil accumulation or bacterial  
251 burdens as compared to WT controls following *M. tuberculosis* infection (**Fig. 2C and D**), indicating that LAP  
252 is not required to control neutrophil inflammation during *M. tuberculosis* infection. Importantly, BECLIN 1 and  
253 ATG5 function at different steps of autophagy. Therefore, the requirement of both BECLIN 1 and ATG5 suggests  
254 that both the initiation and elongation steps of autophagy are required in CD11c<sup>+</sup> cells to control neutrophil  
255 recruitment early during *M. tuberculosis* infection.

256

### 257 **Autophagy regulates proinflammatory responses in macrophages during *M. tuberculosis* infection.**

258 Up to 14 dpi, the primary CD11c<sup>+</sup> cell types that are infected by *M. tuberculosis* are the lung resident macrophages  
259 (35, 36). The absence of differences in *M. tuberculosis* lung burden in *Atg5*<sup>fl/fl</sup>-*Cd11c-Cre* and *Atg5*<sup>fl/fl</sup> mice at 14  
260 dpi indicates that autophagy is not required to control *M. tuberculosis* replication in macrophages. Therefore, the  
261 role of autophagy in CD11c<sup>+</sup> cells could be to regulate signals that recruit neutrophils. We have previously shown  
262 that lungs of *Atg5*<sup>fl/fl</sup>-*LysM-Cre* mice at 14 dpi contain higher levels of G-CSF and IL-17A than control mice (3),  
263 cytokines that promote neutrophil development and recruitment. Therefore, we hypothesized that autophagy  
264 could be suppressing the production of these cytokines from *M. tuberculosis* infected macrophages. We tested  
265 this hypothesis by culturing bone marrow derived macrophages (BMDMs) from *Atg5*<sup>fl/fl</sup>, *Atg5*<sup>fl/fl</sup>-*LysM-Cre*,  
266 *Atg16l1*<sup>fl/fl</sup>, *Atg16l1*<sup>fl/fl</sup>-*LysM-Cre*, *Becn1*<sup>fl/fl</sup>, and *Becn1*<sup>fl/fl</sup>-*LysM-Cre* mice and infecting with *M. tuberculosis* *in*  
267 *vitro* before monitoring cytokine and chemokine production using a cytokine bead array (Bio-Rad) on the  
268 supernatants from infected cultures. Of the 23 cytokines tested, we detected significantly higher levels of IL-1 $\beta$ ,  
269 G-CSF, KC, TNF- $\alpha$  and RANTES from the *Atg5*<sup>fl/fl</sup>-*LysM-Cre* macrophage cultures compared to controls at 24

hpi (**Fig. 3A-F**), despite no difference in bacterial burdens at this time point (**Fig. 3G**). The levels of these cytokines were only different following *M. tuberculosis* infection and not in mock infected cultures, indicating that the increased pro-inflammatory responses were infection-induced. The higher levels of G-CSF and KC, both pro-inflammatory signals associated with neutrophil inflammation (37–39), produced from *Atg5*-deficient macrophages in response to *M. tuberculosis* infection was dose dependent and confirmed by ELISA (**Fig. 3H-I**). Similar to *Atg5<sup>fl/fl</sup>-LysM-Cre* BMDMs, *Atg16l1<sup>fl/fl</sup>-LysM-Cre* BMDMs also produced higher levels of G-CSF, TNF- $\alpha$  and IL-1 $\beta$  following *M. tuberculosis* infection *in vitro* (**Fig. 3A-F**). *Becn1<sup>fl/fl</sup>-LysM-Cre* BMDMs also produced more G-CSF and IL-1 $\beta$  following *M. tuberculosis* infection *in vitro* compared to control cells (**Fig. 3A-F**) despite no difference in *M. tuberculosis* burden at this time point (**Fig. 3G**). In addition, *Becn1<sup>fl/fl</sup>-LysM-Cre* BMDMs produced higher levels of IL-6, MIP-1 $\alpha$ , MIP-1 $\beta$ , and MCP-1 following *M. tuberculosis* infection (**Fig. 3C, Supplemental Fig. 2**). IL-6 in particular is associated with neutrophil recruitment (40–43) and also trended higher in *M. tuberculosis*-infected *Atg5<sup>fl/fl</sup>-LysM-Cre* BMDMs, so we further analyzed the levels of IL-6 produced by *M. tuberculosis*-infected *Atg5<sup>fl/fl</sup>-LysM-Cre* BMDMs using an ELISA. These analyses revealed a dose-dependent increase of IL-6 secretion in *M. tuberculosis*-infected *Atg5<sup>fl/fl</sup>-LysM-Cre* BMDMs. Together these data show that loss of expression of the autophagy proteins ATG5, ATG16L1, and BECLIN 1 results in higher levels of cytokines and chemokines that are associated with neutrophil recruitment and accumulation following *M. tuberculosis* infection relative to controls, indicating that canonical autophagy is required in macrophages to control proinflammatory responses during *M. tuberculosis* infection.

### **Autophagy suppresses neutrophil recruitment early during *M. tuberculosis* infection independent of mitophagy and inflammasome activation.**

Autophagy has been shown to suppress proinflammatory responses by negatively regulating inflammasome activation indirectly through regulation of NF $\kappa$ B signaling and directly by degrading pro-IL-1 $\beta$  and inflammasome components (44), which can otherwise promote pro-inflammatory responses, IL-1 $\beta$  secretion, and neutrophil recruitment (44–48). Indeed, *Atg5<sup>fl/fl</sup>-LysM-Cre*, *Atg16l1<sup>fl/fl</sup>-LysM-Cre* and *Becn1<sup>fl/fl</sup>-LysM-Cre*

295 BMDMs produce significantly more IL-1 $\beta$  in response to *M. tuberculosis* infection *in vitro* at 24 hpi compared to  
296 control BMDMs (**Fig. 3A**), supporting that loss of autophagy has resulted in increased inflammasome activation.  
297 The primary inflammasome activated during *M. tuberculosis* infection of macrophages is the NLRP3  
298 inflammasome, which consists of the NOD-, LRR- and pyrin-domain containing protein 3 (NLRP3) sensor, ASC  
299 adaptor, and caspase 1 (49–52). TLR engagement and NF $\kappa$ B activation during *M. tuberculosis* infection constitute  
300 the priming step of inflammasome activation, resulting in increased expression of pro-IL-1 $\beta$  and NLRP3 (53, 54).  
301 Phagocytosis of *M. tuberculosis* and subsequent Esx-1-dependent plasma membrane damage leading to potassium  
302 efflux is the second signal promoting NLRP3 inflammasome formation, which mediates CASPASE 1 activation  
303 followed by IL-1 $\beta$  processing and secretion (26, 29).

304 To determine whether the increased neutrophil inflammation following *M. tuberculosis* infection in  
305 autophagy-deficient mice results from increased inflammasome activation, we crossed *Caspase1/11*<sup>-/-</sup> mice to  
306 *Atg5*<sup>fl/fl</sup>-*LysM-Cre* and *Becn1*<sup>fl/fl</sup>-*LysM-Cre* mice and monitored neutrophil abundance in the lungs at 14 dpi.  
307 *Caspase1/11*<sup>-/-</sup>/*Atg5*<sup>fl/fl</sup>-*LysM-Cre* and *Caspase1/11*<sup>-/-</sup>/*Becn1*<sup>fl/fl</sup>-*LysM-Cre* mice had similar neutrophil abundances  
308 and bacterial burdens in the lungs at 14 dpi as *Atg5*<sup>fl/fl</sup>-*LysM-Cre* mice and *Becn1*<sup>fl/fl</sup>-*LysM-Cre* mice, respectively  
309 (**Fig. 4A-B**), indicating that increased neutrophil recruitment in the absence of autophagy occurs independent of  
310 CASPASE1/11. *Caspase1/11* deletion also did not extend the survival of *Atg5*<sup>fl/fl</sup>-*LysM-Cre* mice, indicating that  
311 increased inflammasome activation does not contribute to the early susceptibility of these mice (**Fig. 4C**).

312 Autophagy has also been shown to suppress inflammatory responses via the process of mitophagy, where  
313 autophagy targets old and damaged mitochondria to the lysosome for degradation (27, 55). The build-up of  
314 damaged or dysfunctional mitochondria in the absence of autophagy results in loss of mitochondrial membrane  
315 potential and the release of reactive oxygen species (ROS), mitochondrial DNA, and ATP to the cytosol where it  
316 can lead to oxidative damage, inflammasome activation, and pro-inflammatory cytokine production (55–59).  
317 Mitophagy requires the canonical autophagy proteins, including ATG5, ATG16L1, and BECLIN 1, as well as  
318 PARKIN and PTEN-induced kinase 1 (PINK1)(60). PINK1 accumulates on damaged mitochondria and activates  
319 the mitochondrial E3 ubiquitin ligase, PARKIN, to ubiquitinylate damaged mitochondria (56, 59). Optineurin and

NDP52 are the main mitophagy receptors that interact with the ubiquitinated mitochondria and LC3 leading to autophagosome engulfment of the mitochondria (56, 61). To investigate whether loss of mitophagy could contribute to higher neutrophil accumulation in the lungs following *M. tuberculosis* infection, we measured neutrophil frequency in the lung at 14 dpi by flow cytometry in *Parkin*<sup>-/-</sup> and *Pink1*<sup>-/-</sup> mice relative to WT controls. There was no difference in neutrophil abundance or bacterial burdens in *M. tuberculosis*-infected *Parkin*<sup>-/-</sup> or *Pink1*<sup>-/-</sup> mice relative to WT mice at 14 dpi (**Fig. 4D-E**), indicating that mitophagy is not required to control neutrophil recruitment early during *M. tuberculosis* infection. To determine if mitophagy is required in macrophages to control proinflammatory cytokine and chemokine production during *M. tuberculosis* infection we generated BMDMs from *Parkin*<sup>-/-</sup>, *Pink1*<sup>-/-</sup>, and WT mice and infected the macrophages with *M. tuberculosis* for 24 hours. We measured cytokine and chemokine levels from mock and *M. tuberculosis* infected cultures using the cytokine bead array (Bio-Rad). Unlike in autophagy-deficient BMDMs, there were no differences in IL-6, IL-1 $\beta$ , G-CSF, KC, TNF- $\alpha$  or RANTES production by *M. tuberculosis* infected *Parkin*<sup>-/-</sup> and *Pink1*<sup>-/-</sup> macrophages at 24 hpi compared with WT macrophages (**Supplemental Fig. 3**), nor any differences in bacterial burden (**Supplemental Fig. 3**). Therefore, loss of mitophagy in macrophages does not result in higher levels of inflammation during *M. tuberculosis* infection.

335

### 336 **ATG5 is required to suppress early TH17 responses in the lungs during *M. tuberculosis* infection.**

337 The higher levels of IL-17A observed in the lungs of *Atg5*<sup>fl/fl</sup>-*LysM-Cre* mice at 14 dpi with *M. tuberculosis*  
338 relative to controls was not reproduced by BMDMs infected with *M. tuberculosis* for 24 hours (**Supplementary**  
339 **Fig. 2**). Although there are many possible explanations for this, one possibility is that the macrophages were not  
340 the source of IL-17A *in vivo*. We investigated what cell type was expressing higher levels of IL-17A in the *Atg5*<sup>fl/fl</sup>-  
341 *LysM-Cre* mice during *M. tuberculosis* infection by crossing the *Atg5*<sup>fl/fl</sup> and *Atg5*<sup>fl/fl</sup>-*LysM-Cre* mice with an IL-  
342 17A reporter mouse that expresses GFP under the IL-17A promoter (*Il17a-GFP*, Jax #018472). We infected  
343 *Il17a-GFP/Atg5*<sup>fl/fl</sup> and *Il17a-GFP/Atg5*<sup>fl/fl</sup>-*LysM-Cre* mice with *M. tuberculosis* and monitored GFP expression  
344 as a proxy of IL-17A expression in immune cells at 14 dpi. The only cell type we reproducibly detected >0.5%

345 of the cells expressing GFP were CD4<sup>+</sup> T cells. Similar to previous studies with *Atg5<sup>fl/fl</sup>* and *Atg5<sup>fl/fl</sup>-LysM-Cre*  
346 mice, there was no difference in total CD4<sup>+</sup> T cell numbers in the lungs of *Il17a-GFP/Atg5<sup>fl/fl</sup>* and *Il17a-*  
347 *GFP/Atg5<sup>fl/fl</sup>-LysM-Cre* mice at 14 dpi (**Fig. 5A**) (3). However, a greater frequency and number of the CD4<sup>+</sup> T  
348 cells in the lungs of *Il17a-GFP/Atg5<sup>fl/fl</sup>-LysM-Cre* mice at 14 dpi were IL-17-GFP<sup>+</sup> compared to *Il17a-*  
349 *GFP/Atg5<sup>fl/fl</sup>* mice (**Fig. 5B-C**). These data indicate that CD4<sup>+</sup> T cells contribute to the higher levels of IL-17A in  
350 the lungs of *M. tuberculosis* infected *Atg5<sup>fl/fl</sup>-LysM-Cre* mice and ATG5 is required in innate immune cells to  
351 negatively regulate T<sub>H</sub>17 responses during *M. tuberculosis* infection.

352 IL-17A drives neutrophil influx by promoting the production of neutrophil chemokines MIP-1 $\alpha$  and KC  
353 and through activation of endothelial cells (62–64). Therefore, the increased T<sub>H</sub>17 responses could be responsible  
354 for the early influx and accumulation of neutrophils in the lungs of *M. tuberculosis*-infected *Atg5<sup>fl/fl</sup>-LysM-Cre*  
355 mice. To determine if the increased expression of IL-17A by T cells was responsible for the enhanced influx of  
356 neutrophils at 14 dpi in *Atg5<sup>fl/fl</sup>-LysM-Cre* mice, we depleted CD4<sup>+</sup> T cells by administering antibodies specific  
357 for CD4 from day -2 to 14 dpi (**Fig. 5D-E**). At 14 dpi, we harvested the lungs for enumeration of *M. tuberculosis*  
358 burden and neutrophil abundance and found that there was no effect of CD4<sup>+</sup> T cell depletion on either readout  
359 (**Fig. 5F-G**). In addition, blocking IL-17A signaling by administering an anti-IL-17A antibody from day -1 to 14  
360 dpi (**Fig. 5H**) did not affect *M. tuberculosis* burden (**Fig. 5I**) or neutrophil abundance (**Fig. 5J**) in *Atg5<sup>fl/fl</sup>-LysM-*  
361 *Cre* mice and *Atg5<sup>fl/fl</sup>* mice at 14 dpi. Therefore, although ATG5 is required in innate immune cells to suppress  
362 IL-17A expression in T cells, this role does not contribute to differences in neutrophil accumulation early during  
363 *M. tuberculosis* infection.

364

365

366

367

368

369

## DISCUSSION

*Atg5<sup>fl/fl</sup>-LysM-Cre* mice are extremely susceptible to *M. tuberculosis* infection, where neutrophils accumulate in the lungs of infected *Atg5<sup>fl/fl</sup>-LysM-Cre* mice by 14 dpi and are sustained at high levels until the mice succumb to the infection between 30-40 dpi (3). It was previously unknown how ATG5 imparted control of neutrophil recruitment to the lungs during *M. tuberculosis* infection. We have discovered that ATG5 is required in CD11c<sup>+</sup> lung macrophages and DCs to regulate proinflammatory cytokine production and neutrophil influx during *M. tuberculosis* infection. This role for ATG5 is shared with ATG16L1 and BECLIN 1, but not RUBICON, suggesting it is autophagy dependent and does not involve LAP. We were able to reproduce the heightened proinflammatory responses in *M. tuberculosis* infected autophagy-deficient BMDMs *in vitro*, suggesting that autophagy specifically suppresses inflammatory responses from macrophages during *M. tuberculosis* infection, although this does not rule out a similar role in DCs *in vivo*. Alveolar macrophages are among the first cells to encounter *M. tuberculosis* in the airways and orchestrate the initial response to infection, recruiting other innate immune cells to the lung (35, 36). We postulate that similar to the BMDMs, autophagy-deficient alveolar macrophages overproduce pro-inflammatory signals during *M. tuberculosis* infection, leading to increased neutrophil recruitment.

The increased levels of cytokines and chemokines produced by autophagy-deficient macrophages was dependent on *M. tuberculosis* infection, demonstrating that pathogen detection was required. However, the heightened proinflammatory responses in autophagy-deficient macrophages occurred in the absence of differences in bacterial burden, indicating that the enhanced inflammatory response is not due to increased antigen. In addition, the observation that loss of autophagy in macrophages *in vitro* or *in vivo* does not affect *M. tuberculosis* burden supports our prior findings that xenophagy is not required to control *M. tuberculosis* pathogenesis (3). Instead, our data supports a model where canonical autophagy is required in macrophages to control proinflammatory responses following *M. tuberculosis* infection. We ruled out the involvement of CASPASE1/11-dependent inflammasome activity and mitophagy in autophagy-dependent regulation of neutrophil accumulation during *M. tuberculosis* infection, leaving open the question of how autophagy regulates



395 macrophage proinflammatory responses during infection. One potential mechanism could involve the  
396 accumulation of damage associated signals in autophagy-deficient macrophages during infection. Release of  
397 damage associated molecular patterns (DAMPs) at sites of injury or infection activate endothelial cells to promote  
398 neutrophil adhesion and recruitment through cytokine and chemokine signaling (65). Sensing of DAMPs also  
399 activates autophagy to reduce inflammatory responses and cytokine production as well as clear cell debris (65,  
400 66). Another possible mechanism for how autophagy regulates inflammatory responses from macrophages during  
401 *M. tuberculosis* infection involves the process of ER-phagy. ER-phagy is induced under conditions of ER stress,  
402 accumulation of unfolded proteins, and during infection (67, 68). ER-phagy restrains ER stress responses by  
403 targeting excess or damaged endoplasmic reticulum to autophagosomes for degradation (67), but in the absence  
404 of autophagy, ER stress activates NF $\kappa$ B-dependent transcription of inflammatory cytokines, such as IL-1 $\beta$ , IL-6,  
405 IL-18 and TNF- $\alpha$  (68).

406 We also discovered that ATG5 was required in innate immune cells to suppress early T<sub>H</sub>17 responses  
407 during *M. tuberculosis* infection. The effect of loss of *Atg5* in innate immune cells on IL-17A expression from T  
408 cells may be explained by the requirement for autophagy in DCs to negatively regulate surface expression of  
409 disintegrin and metalloproteinase domain-containing protein 10 (ADAM10). ADAM10 cleaves its substrate  
410 ICOSL and lower levels of ICOSL leads to decreased ICOSL-ICOS interactions between DCs and T cells,  
411 resulting in less CD25<sup>hi</sup> CD4<sup>+</sup> T regulatory cells and more IL-17<sup>+</sup> CD4<sup>+</sup> T cells (69). In addition, autophagy  
412 negatively regulates T<sub>H</sub>17 differentiation by reducing IL-23 and IL-1 $\beta$  levels, which promote T<sub>H</sub>17 differentiation  
413 and IL-17A secretion (4, 70–72). Nonetheless, depleting CD4<sup>+</sup> T cells or blocking IL-17A did not rescue the  
414 increased neutrophil accumulation in the lungs of *M. tuberculosis* infected *Atg5<sup>fl/fl</sup>-LysM-Cre* mice at 14 dpi,  
415 suggesting that the hyper-inflammatory responses from infected autophagy-deficient macrophages and DCs is  
416 sufficient to recruit excessive neutrophils early during infection. However, it is possible that the heightened T<sub>H</sub>17  
417 responses in *M. tuberculosis* infected *Atg5<sup>fl/fl</sup>-LysM-Cre* mice have a longer-term impact on the increased  
418 susceptibility of these mice.

419 Our studies show that neutrophil recruitment to the lung early during *M. tuberculosis* infection is regulated  
420 in an autophagy-dependent manner, leaving open the question of what the autophagy-independent function for  
421 ATG5 is that has been shown to be required to control *M. tuberculosis* pathogenesis (3). At this point, we do not  
422 know if the increased abundance of IL-17<sup>+</sup> CD4<sup>+</sup> T cells in *M. tuberculosis* infected *Atg5<sup>fl/fl</sup>-LysM-Cre* mice is  
423 due to an autophagy-dependent or independent role for ATG5. In addition, we have previously shown that loss  
424 of *Atg5* expression in neutrophils can result in earlier susceptibility than mice lacking the expression of other  
425 autophagy genes in neutrophils (3), suggesting that there is an autophagy-independent role for ATG5 in  
426 neutrophils that contributes to control of *M. tuberculosis* infection. We hypothesize that the combination of the  
427 newly discovered roles for autophagy in CD11c<sup>+</sup> lung macrophages and DCs to regulate inflammatory responses  
428 and an autophagy-independent role for ATG5 in neutrophils collectively allow for control of *M. tuberculosis*  
429 infection, where loss of both functions results in the extreme susceptibility of *Atg5<sup>fl/fl</sup>-LysM-Cre* mice to *M.*  
430 *tuberculosis* infection. Higher abundances of neutrophils have been associated with poor disease prognosis and  
431 treatment outcomes in TB patients (14–16). Therefore, our new findings and future dissection of the ATG5-  
432 dependent mechanisms of regulating neutrophil recruitment to the lungs during *M. tuberculosis* infection will  
433 provide critical insight into how to promote protective immune responses during TB.

## 444 ACKNOWLEDGEMENTS

445 The authors thank Dr. Jonathan Brestoff at Washington University School of Medicine for generously providing  
446 the *Parkin*<sup>-/-</sup> and *Pink1*<sup>-/-</sup> mice.

## 447 AUTHOR CONTRIBUTIONS

448 The experiments were designed by R.L.K., J.M.K., and C.L.S.. The experiments were executed by R.L.K., J.M.K.,  
449 and A.S. with assistance from R.W., M.R.G. and S.M.C.. D.K. bred and maintained the mouse colonies. The  
450 manuscript was written by R.L.K. and C.L.S..

## 451 FIGURE LEGENDS

452 **Figure 1. ATG5 is required in CD11c<sup>+</sup> cells to regulate the early influx of neutrophils during *M. tuberculosis***  
453 **infection *in vivo*.** (A) Representative flow cytometry plots of neutrophils (CD45<sup>+</sup>Ly6G<sup>+</sup>CD11b<sup>+</sup>) at 14 days post-  
454 infection (dpi) from *Atg5*<sup>fl/fl</sup>, *Atg5*<sup>fl/fl</sup>-*LysM-Cre*, *Atg5*<sup>fl/fl</sup>-*CD11c-Cre* and *Atg5*<sup>fl/fl</sup>-*Mrp8-Cre* mice. (B) Proportion  
455 of CD45<sup>+</sup> cells that are neutrophils in the lung at 14 dpi in *Atg5*<sup>fl/fl</sup>, *Atg5*<sup>fl/fl</sup>-*LysM-Cre*, *Atg5*<sup>fl/fl</sup>-*CD11c-Cre*, and  
456 *Atg5*<sup>fl/fl</sup>-*Mrp8-Cre* mice. Neutrophil frequency is reported as a ratio relative to the average neutrophil frequency  
457 in *Atg5*<sup>fl/fl</sup> control mice at 14 dpi within a given experiment. (C) Lung burden from the right lung at 14 dpi in  
458 *Atg5*<sup>fl/fl</sup>, *Atg5*<sup>fl/fl</sup>-*LysM-Cre*, *Atg5*<sup>fl/fl</sup>-*CD11c-Cre*, and *Atg5*<sup>fl/fl</sup>-*Mrp8-Cre* mice. (D) Proportion of CD45<sup>+</sup> cells that  
459 are neutrophils in the lung at 21 dpi in *Atg5*<sup>fl/fl</sup>, *Atg5*<sup>fl/fl</sup>-*LysM-Cre*, *Atg5*<sup>fl/fl</sup>-*CD11c-Cre* and *Atg5*<sup>fl/fl</sup>-*Mrp8-Cre*  
460 mice. Neutrophil frequency is reported as a ratio relative to the average neutrophil frequency in *Atg5*<sup>fl/fl</sup> control  
461 mice at 21 dpi within a given experiment. Sick and healthy *Atg5*<sup>fl/fl</sup>-*Mrp8-Cre* mice are defined as done previously  
462 where sick *Atg5*<sup>fl/fl</sup>-*Mrp8-Cre* mice have lost more than 30% of their pre-infection body weight by 21 dpi and  
463 healthy *Atg5*<sup>fl/fl</sup>-*Mrp8-Cre* mice have lost less than 30% of their pre-infection body weight at 21 dpi (3). (E) Lung  
464 burden from the right lung at 21 dpi in *Atg5*<sup>fl/fl</sup>, *Atg5*<sup>fl/fl</sup>-*LysM-Cre*, *Atg5*<sup>fl/fl</sup>-*CD11c-Cre*, and *Atg5*<sup>fl/fl</sup>-*Mrp8-Cre*  
465 mice. (F) Kaplan Meier curve of survival proportions during *M. tuberculosis* infection of *Atg5*<sup>fl/fl</sup> and *Atg5*<sup>fl/fl</sup>-  
466 *CD11c-Cre* mice. Statistical differences were determined by a log-rank Mantel-Cox test (F) or one-way ANOVA  
467 and Šidák multiple comparison test (B-E). \* P < 0.05, \*\* P < 0.01, \*\*\* P < 0.001, \*\*\*\* P < 0.0001. Differences

468 that are not statistically significant are designated as ns. Each data point is from one biological replicate and at  
469 least two separate experiments were performed.

470

471 **Figure 2. The role for ATG5 in macrophages and DCs in regulating neutrophil recruitment is dependent**

472 **on other autophagy proteins. (A)** Proportion of CD45<sup>+</sup> cells that are neutrophils (CD45<sup>+</sup>Ly6G<sup>+</sup>CD11b<sup>+</sup>) in the

473 lung at 14 dpi in *Becn1<sup>fl/fl</sup>* or *Becn1<sup>fl/fl</sup>-CD11c-Cre* mice. Neutrophil frequency is reported as a ratio relative to the

474 average neutrophil frequency in *Becn1<sup>fl/fl</sup>* control mice at 14 dpi. **(B)** Lung burden from the right lobes of the lung

475 at 14 dpi in *Becn1<sup>fl/fl</sup>* or *Becn1<sup>fl/fl</sup>-CD11c-Cre* mice. **(C)** Neutrophil frequency of CD45<sup>+</sup> cells reported as a ratio

476 to the average neutrophil frequency in floxed control mice in *Atg5<sup>fl/fl</sup>*, *Atg5<sup>fl/fl</sup>-LysM-Cre*, *Becn1<sup>fl/fl</sup>*, *Becn1<sup>fl/fl</sup>-*

477 *LysM-Cre*, *Atg16l1<sup>fl/fl</sup>*, *Atg16l1<sup>fl/fl</sup>-LysM-Cre* mice. Neutrophil frequencies in *Rubicon<sup>-/-</sup>* mice were compared to

478 wildtype C57BL/6J mice. **(D)** Lung burden from right lobes of the lung at 14 dpi in *Atg5<sup>fl/fl</sup>*, *Atg5<sup>fl/fl</sup>-LysM-Cre*,

479 *Becn1<sup>fl/fl</sup>*, *Becn1<sup>fl/fl</sup>-LysM-Cre*, *Atg16l1<sup>fl/fl</sup>*, *Atg16l1<sup>fl/fl</sup>-LysM-Cre*, wildtype C57BL/6J, and *Rubicon<sup>-/-</sup>* mice.

480 Statistical differences were determined by student t-test to compare the Cre expressing mice to their respective

481 floxed control and *Rubicon<sup>-/-</sup>* mice to wildtype C57BL/6J mice (A-D). \* P < 0.05, \*\* P < 0.01, \*\*\* P < 0.001,

482 \*\*\*\* P < 0.0001. Differences that are not statistically significant are designated as ns. Each data point is from one

483 biological replicate and at least two separate experiments were performed.

484

485 **Figure 3. Autophagy regulates proinflammatory responses in macrophages during *M. tuberculosis***

486 **infection. (A)** Cytokine bead array data to quantify cytokines in culture supernatants from *Atg5<sup>fl/fl</sup>*, *Atg5<sup>fl/fl</sup>-LysM-*

487 *Cre<sup>-</sup>*, *Atg16l1<sup>fl/fl</sup>*, *Atg16l1<sup>fl/fl</sup>-LysM-Cre*, *Becn1<sup>fl/fl</sup>* or *Becn1<sup>fl/fl</sup>-LysM-Cre* BMDMs mock-treated or infected with

488 *M. tuberculosis* at an MOI of 10 for 24 hours. BMDMs generated from at least 3 mice were tested in duplicate to

489 quantify cytokine production. **(A)** IL-1 $\beta$ , **(B)** G-CSF, **(C)** IL-6, **(D)** KC, and **(E)** TNF- $\alpha$ , and **(F)** RANTES levels

490 at 24 hpi are shown. **(G)** BMDM CFU counts at 24 hpi. **(H)** KC, **(I)** G-CSF, and **(J)** IL-6 levels at 24 hpi in *Atg5<sup>fl/fl</sup>*

491 and *Atg5<sup>-/-</sup>* BMDMs infected with *M. tuberculosis* at an MOI of 10 or 20 for 24 hours determined by ELISA.

492 Statistical differences were determined by student t-test to compare the autophagy gene-deficient cells to their

493 respective floxed control cells (A-J). \*  $P < 0.05$ , \*\*  $P < 0.01$ , \*\*\*  $P < 0.001$ , \*\*\*\*  $P < 0.0001$ . Differences that  
494 are not statistically significant are designated as ns. Cytokine levels below detection limits are designated as bdl.  
495 Each data point is one biological replicate.

496

497 **Figure 4. Autophagy suppresses neutrophil recruitment independent of mitophagy and inflammasome**  
498 **activation during *M. tuberculosis* infection.** (A) Proportion of CD45<sup>+</sup> cells that are neutrophils  
499 (CD45<sup>+</sup>Ly6G<sup>+</sup>CD11b<sup>+</sup>) in the lung at 14 dpi in *Becn1*<sup>fl/fl</sup>, *Becn1*<sup>fl/fl</sup>-*LysM-Cre*, *Caspase1/11*<sup>-/-</sup>/*Becn1*<sup>fl/fl</sup>,  
500 *Caspase1/11*<sup>-/-</sup>/*Becn1*<sup>fl/fl</sup>-*LysM-Cre*, *Atg5*<sup>fl/fl</sup>, *Atg5*<sup>fl/fl</sup>-*LysM-Cre*, *Caspase1/11*<sup>-/-</sup>/*Atg5*<sup>fl/fl</sup>, or *Caspase1/11*<sup>-/-</sup>/*Atg5*<sup>fl/fl</sup>-  
501 *LysM-Cre* mice reported as a ratio relative to the average neutrophil frequency in corresponding floxed control  
502 mice. (B) Lung burden at 14 dpi from right lobes of the lung from *Becn1*<sup>fl/fl</sup>, *Becn1*<sup>fl/fl</sup>-*LysM-Cre*, *Caspase1/11*<sup>-/-</sup>/  
503 *Becn1*<sup>fl/fl</sup>, *Caspase1/11*<sup>-/-</sup>/*Becn1*<sup>fl/fl</sup>-*LysM-Cre*, *Atg5*<sup>fl/fl</sup>, *Atg5*<sup>fl/fl</sup>-*LysM-Cre*, *Caspase1/11*<sup>-/-</sup>/*Atg5*<sup>fl/fl</sup>, or  
504 *Caspase1/11*<sup>-/-</sup>/*Atg5*<sup>fl/fl</sup>-*LysM-Cre* mice. The legend in 4A also applies to 4B. (C) Kaplan Meier curve of survival  
505 proportions during *M. tuberculosis* infection of *Atg5*<sup>fl/fl</sup>, *Atg5*<sup>fl/fl</sup>-*LysM-Cre*, *Caspase1/11*<sup>-/-</sup>/*Atg5*<sup>fl/fl</sup>, and  
506 *Caspase1/11*<sup>-/-</sup>/*Atg5*<sup>fl/fl</sup>-*LysM-Cre* mice. (D) Proportion of CD45<sup>+</sup> cells that are neutrophils  
507 (CD45<sup>+</sup>Ly6G<sup>+</sup>CD11b<sup>+</sup>) in the lung at 14 dpi in wildtype, *Parkin*<sup>-/-</sup>, and *Pink1*<sup>-/-</sup> mice reported as a ratio relative  
508 to the average neutrophil frequency in wildtype C57BL/6J mice. (E) Lung burden from the right lobe of the lung  
509 at 14 dpi in wildtype C57BL/6J, *Parkin*<sup>-/-</sup>, and *Pink1*<sup>-/-</sup> mice. Statistical differences were determined by log-rank  
510 Mantel-Cox test (C) and one-way ANOVA and Šídák multiple comparison test (A-B, D-E). \*  $P < 0.05$ , \*\*  $P <$   
511  $0.01$ , \*\*\*  $P < 0.001$ , \*\*\*\*  $P < 0.0001$ . Differences that are not statistically significant are designated as ns. Each  
512 data point is from one biological replicate and at least two separate experiments were performed.

513

514 **Figure 5. ATG5 is required to suppress early TH17 responses during *M. tuberculosis* infection.** (A) The  
515 number of CD4<sup>+</sup> T cells (CD45<sup>+</sup> TCRβ<sup>+</sup> CD4<sup>+</sup>) in *Atg5*<sup>fl/fl</sup> and *Atg5*<sup>fl/fl</sup>-*LysM-Cre* mice are reported as the total  
516 cells per lung in the left lobe at 14 dpi. (B) The frequency of IL-17-GFP<sup>+</sup> CD4<sup>+</sup> T cells in the lung (CD45<sup>+</sup> TCRβ<sup>+</sup>  
517 CD4<sup>+</sup> IL-17-GFP<sup>+</sup>) of *Atg5*<sup>fl/fl</sup> and *Atg5*<sup>fl/fl</sup>-*LysM-Cre* mice are reported as the percentage of CD4<sup>+</sup> T cells that are

518 IL-17-GFP positive at 14 dpi. (C) The number IL-17-GFP<sup>+</sup> CD4<sup>+</sup> T cells in *Atg5<sup>fl/fl</sup>* and *Atg5<sup>fl/fl</sup>-LysM-Cre* mice  
519 are reported as the total cells per lung in the left lobe at 14 dpi. (D) Schematic depicting the timing of CD4  
520 antibody injections. (E) The number of CD4<sup>+</sup> T cells (CD45<sup>+</sup> TCRβ<sup>+</sup> CD4<sup>+</sup>) in *Atg5<sup>fl/fl</sup>* and *Atg5<sup>fl/fl</sup>-LysM-Cre* mice  
521 are reported as the total cells per lung in the left lobe at 14 dpi following antibody treatment. (F) Lung burden  
522 from the right lobes of the lung at 14 dpi in *Atg5<sup>fl/fl</sup>* or *Atg5<sup>fl/fl</sup>-LysM-Cre* mice that received isotype or CD4-  
523 depletion antibodies. (G) Proportion of CD45<sup>+</sup> cells that are neutrophils (CD45<sup>+</sup>Ly6G<sup>+</sup>CD11b<sup>+</sup>) in the lung at 14  
524 dpi in *Atg5<sup>fl/fl</sup>* or *Atg5<sup>fl/fl</sup>-LysM-Cre* mice that received CD4 antibody or an isotype control. Neutrophil frequency  
525 is reported as a ratio relative to the average neutrophil frequency in *Atg5<sup>fl/fl</sup>* control mice at 14 dpi. (H) Schematic  
526 depicting delivery of the IL-17 neutralizing antibody treatments. (I) Lung burden from the right lobes of the lung  
527 at 14 dpi in *Atg5<sup>fl/fl</sup>* or *Atg5<sup>fl/fl</sup>-LysM-Cre* mice that received isotype or IL-17 neutralizing antibodies. (J) Proportion  
528 of CD45<sup>+</sup> cells that are neutrophils (CD45<sup>+</sup>Ly6G<sup>+</sup>CD11b<sup>+</sup>) in the lung at 14 dpi in *Atg5<sup>fl/fl</sup>* or *Atg5<sup>fl/fl</sup>-LysM-Cre*  
529 mice that received isotype or IL-17 neutralizing antibodies. Neutrophil frequency is reported as a ratio relative to  
530 the average neutrophil frequency in *Atg5<sup>fl/fl</sup>* control mice at 14 dpi. Statistical differences were determined by  
531 student t-test (A) or one-way ANOVA and Šídák multiple comparison test (A-C, E-G, I and J). \* P < 0.05, \*\* P  
532 < 0.01, \*\*\* P < 0.001, \*\*\*\* P < 0.0001. Differences that are not statistically significant are designated as ns. Each  
533 data point is from one biological replicate.

534

535 **Supplemental Figure 1. Gating strategies for flow cytometry identification of neutrophils and IL-17A**  
536 **expressing T cells.** (A) Cells from the lung were identified as viable by not staining with Zombie-NIR,  
537 hematopoietic cells were identified as CD45<sup>+</sup> and neutrophils were identified as Ly6G<sup>+</sup> and CD11b<sup>+</sup>. (B) T<sub>H</sub>17  
538 cells were identified in *Il17a-GFP/Atg5<sup>fl/fl</sup>* and *Il17a-GFP/Atg5<sup>fl/fl</sup>-LysM-Cre* mice by gating viable cells based on  
539 not staining with Zombie-NIR, hematopoietic cells were identified as CD45<sup>+</sup>, all non-neutrophils were identified  
540 as Ly6G<sup>-</sup>, and CD4<sup>+</sup> T cells were identified as TCRβ<sup>+</sup>, CD19<sup>-</sup>, and CD4<sup>+</sup>. IL-17 expressing T cells were gated as  
541 IL-17-GFP<sup>+</sup> CD4<sup>+</sup> T cells.

542

543 **Supplemental Figure 2. Levels of cytokines and chemokines that were not significantly different in ATG5-**  
544 **deficient macrophages.** Cytokine bead array data from mock treated and *M. tuberculosis* infected BMDMs.  
545 *Atg5<sup>fl/fl</sup>*, *Atg5<sup>fl/fl</sup>-LysM-Cre*, *Atg16l1<sup>fl/fl</sup>*, *Atg16l1<sup>fl/fl</sup>-LysM-Cre*, *Becn1<sup>fl/fl</sup>* and *Becn1<sup>fl/fl</sup>-LysM-Cre* BMDMs were  
546 cultured for 24 hpi and cytokine levels were measured in the media from mock treated or infected macrophages.  
547 BMDMs from at least 3 mice were tested in duplicate to quantify the cytokines in the bead array. All cytokine  
548 and chemokine data that are not significantly different between macrophages cultured from *Atg5<sup>fl/fl</sup>-LysM-Cre*  
549 and *Atg5<sup>fl/fl</sup>* mice are reported here. (A) IL-1 $\alpha$ , (B) IL-3, (C) IL-4, (D) IL-5, (E) IL-10, (F) IL-12(p40), (G) IL-  
550 12(p70), (H) IFN- $\gamma$ , (I) MIP1 $\beta$ , (J) GM-CSF, (K) MIP1 $\alpha$ , (L) MCP-1, (M) Eotaxin, and (N) IL-17 levels at 24  
551 hpi. Statistical differences were determined by student t-test comparing the autophagy deficient macrophage with  
552 its floxed control within a treatment condition (A-N). \* P < 0.05, \*\* P < 0.01, \*\*\* P < 0.001, \*\*\*\* P < 0.0001.  
553 Cytokine levels below detection limits are designated as bdl. Differences that are not statistically significant are  
554 designated as ns.

555 **Supplemental Figure 3. Mitophagy is not required in macrophages to regulate proinflammatory responses**  
556 **during *M. tuberculosis* infection.** WT, *Parkin<sup>-/-</sup>* and *Pink1<sup>-/-</sup>*, BMDMs were cultured for 24 hpi and cytokine  
557 levels were measured by cytokine bead array in the media from mock treated or infected macrophages. (A) IL-1 $\beta$   
558 levels at 24 hpi. (B) G-CSF levels at 24 hpi. (C) IL-6 levels at 24 hpi. (D) KC levels at 24 hpi. (E) RANTES  
559 levels at 24 hpi. (F) TNF- $\alpha$  levels at 24 hpi. (G) BMDM CFU counts at 24 hpi. BMDMs from at least 3 mice  
560 were tested in duplicate to quantify the cytokines in the bead array. Each point is one biological replicate.  
561 Statistical differences were determined by one-way ANOVA and Šídák multiple comparison test (A-G). \* P <  
562 0.05, \*\* P < 0.01, \*\*\* P < 0.001, \*\*\*\* P < 0.0001. Cytokine levels below detection limits are designated as dbl.  
563 Statistical differences that are not significant are designated as ns.

564

565

566

567

## 568 REFERENCES

- 569 1. World Health Organization. Regional Office for South-East Asia. 2022. *WHO global Tuberculosis report 2021*,. World  
570 Health Organization. Regional Office for South-East Asia, New Delhi.
- 571 2. Kinsella, R., D. Zhu, G. Harrison, A. Mayer Bridwell, J. Prusa, S. Chavez, and C. Stallings. 2021. Perspectives and  
572 Advances in the Understanding of Tuberculosis. *Annu Rev Pathol.* 16: 377–408.
- 573 3. Kimmey, J. M., J. P. Huynh, L. A. Weiss, S. Park, A. Kambal, J. Debnath, H. W. Virgin, and C. L. Stallings. 2015. Unique  
574 role for ATG5 in neutrophil-mediated immunopathology during M. tuberculosis infection. *Nature* 528: 565–569.
- 575 4. Castillo, E. F., A. Dekonenko, J. Arko-Mensah, M. A. Mandell, N. Dupont, S. Jiang, M. Delgado-Vargas, G. S. Timmins, D.  
576 Bhattacharya, H. Yang, J. Hutt, C. R. Lyons, K. M. Dobos, and V. Deretic. 2012. Autophagy protects against active  
577 tuberculosis by suppressing bacterial burden and inflammation. *Proc. Natl. Acad. Sci.* 109: E3168–E3176.
- 578 5. Watson, R. O., P. S. Manzanillo, and J. S. Cox. 2012. Extracellular M. tuberculosis DNA Targets Bacteria for Autophagy  
579 by Activating the Host DNA-Sensing Pathway. *Cell* 150: 803–815.
- 580 6. Mishra, B. B., R. R. Lovewell, A. J. Olive, G. Zhang, W. Wang, E. Eugenin, C. M. Smith, J. Y. Phuah, J. E. Long, M. L.  
581 Dubuke, S. G. Palace, J. D. Goguen, R. E. Baker, S. Nambi, R. Mishra, M. G. Booty, C. E. Baer, S. A. Shaffer, V. Dartois, B. A.  
582 McCormick, X. Chen, and C. M. Sasseti. 2017. Nitric oxide prevents a pathogen-permissive granulocytic inflammation  
583 during tuberculosis. *Nat. Microbiol.* 2: 17072.
- 584 7. Mishra, B. B., V. A. K. Rathinam, G. W. Martens, A. J. Martinot, H. Kornfeld, K. A. Fitzgerald, and C. M. Sasseti. 2013.  
585 Nitric oxide controls the immunopathology of tuberculosis by inhibiting NLRP3 inflammasome–dependent processing of  
586 IL-1 $\beta$ . *Nat. Immunol.* 14: 52–60.
- 587 8. Nandi, B., and S. M. Behar. 2011. Regulation of neutrophils by interferon- $\gamma$  limits lung inflammation during  
588 tuberculosis infection. *J. Exp. Med.* 208: 2251–2262.
- 589 9. Niazi, M. K. K., N. Dhulekar, D. Schmidt, S. Major, R. Cooper, C. Abeijon, D. Gatti, I. Kramnik, B. Yener, M. Gurcan, and  
590 G. Beamer. 2015. Lung necrosis and neutrophils reflect common pathways of susceptibility to *Mycobacterium*  
591 *tuberculosis* in genetically diverse, immune competent mice. *Dis. Model. Mech.* dmm.020867.
- 592 10. Nair, S., J. P. Huynh, V. Lampropoulou, E. Loginicheva, E. Esaulova, A. P. Gounder, A. C. M. Boon, E. A. Schwarzkopf, T.  
593 R. Bradstreet, B. T. Edelson, M. N. Artyomov, C. L. Stallings, and M. S. Diamond. 2018. Irg1 expression in myeloid cells  
594 prevents immunopathology during M. tuberculosis infection. *J. Exp. Med.* 215: 1035–1045.
- 595 11. Dorhoi, A., V. Yermeev, G. Nouailles, J. Weiner, S. Jörg, E. Heinemann, D. Oberbeck-Müller, J. K. Knaul, A. Vogelzang,  
596 S. T. Reece, K. Hahnke, H. Mollenkopf, V. Brinkmann, and S. H. E. Kaufmann. 2014. Type I IFN signaling triggers  
597 immunopathology in tuberculosis-susceptible mice by modulating lung phagocyte dynamics. *Eur. J. Immunol.* 44: 2380–  
598 2393.
- 599 12. Moreira-Teixeira, L., P. J. Stimpson, E. Stavropoulos, S. Hadebe, P. Chakravarty, M. Ioannou, I. V. Aramburu, E.  
600 Herbert, S. L. Priestnall, A. Suarez-Bonnet, J. Sousa, K. L. Fonseca, Q. Wang, S. Vashakidze, P. Rodríguez-Martínez, C.  
601 Vilaplana, M. Saraiva, V. Papayannopoulos, and A. O’Garra. 2020. Type I IFN exacerbates disease in tuberculosis-  
602 susceptible mice by inducing neutrophil-mediated lung inflammation and NETosis. *Nat. Commun.* 11: 5566.
- 603 13. Moreira-Teixeira, L., O. Tabone, C. M. Graham, A. Singhanian, E. Stavropoulos, P. S. Redford, P. Chakravarty, S. L.  
604 Priestnall, A. Suarez-Bonnet, E. Herbert, K. D. Mayer-Barber, A. Sher, K. L. Fonseca, J. Sousa, B. Cá, R. Verma, P. Haldar,  
605 M. Saraiva, and A. O’Garra. 2020. Mouse transcriptome reveals potential signatures of protection and pathogenesis in  
606 human tuberculosis. *Nat. Immunol.* 21: 464–476.



- 607 14. Carvalho, A. C. C., G. Amorim, M. G. M. Melo, A. K. A. Silveira, P. H. L. Vargas, A. S. R. Moreira, M. S. Rocha, A. B.  
608 Souza, M. B. Arriaga, M. Araújo-Pereira, M. C. Figueiredo, B. Durovni, J. R. Lapa-e-Silva, S. Cavalcante, V. C. Rolla, T. R.  
609 Sterling, M. Cordeiro-Santos, B. B. Andrade, E. C. Silva, A. L. Kritski, and the RePORT Brazil consortium. 2021. Pre-  
610 Treatment Neutrophil Count as a Predictor of Antituberculosis Therapy Outcomes: A Multicenter Prospective Cohort  
611 Study. *Front. Immunol.* 12: 661934.
- 612 15. Han, Y., S. J. Kim, S. H. Lee, Y. S. Sim, Y. J. Ryu, J. H. Chang, S. S. Shim, Y. Kim, and J. H. Lee. 2018. High blood  
613 neutrophil-lymphocyte ratio associated with poor outcomes in miliary tuberculosis. *J. Thorac. Dis.* 10: 339–346.
- 614 16. Lowe, D. M., A. K. Bandara, G. E. Packe, R. D. Barker, R. J. Wilkinson, C. J. Griffiths, and A. R. Martineau. 2013.  
615 Neutrophilia independently predicts death in tuberculosis: Table 1–. *Eur. Respir. J.* 42: 1752–1757.
- 616 17. Berry, M. P. R., C. M. Graham, F. W. McNab, Z. Xu, S. A. A. Bloch, T. Oni, K. A. Wilkinson, R. Banchereau, J. Skinner, R.  
617 J. Wilkinson, C. Quinn, D. Blankenship, R. Dhawan, J. J. Cush, A. Mejias, O. Ramilo, O. M. Kon, V. Pascual, J. Banchereau,  
618 D. Chaussabel, and A. O’Garra. 2010. An interferon-inducible neutrophil-driven blood transcriptional signature in human  
619 tuberculosis. *Nature* 466: 973–977.
- 620 18. Kinsella, R. L., E. M. Nehls, and C. L. Stallings. 2018. Roles for Autophagy Proteins in Immunity and Host Defense. *Vet.*  
621 *Pathol.* 55: 366–373.
- 622 19. Kimmey, J. M., and C. L. Stallings. 2016. Bacterial Pathogens versus Autophagy: Implications for Therapeutic  
623 Interventions. *Trends Mol. Med.* 22: 1060–1076.
- 624 20. Lamb, C. A., T. Yoshimori, and S. A. Tooze. 2013. The autophagosome: origins unknown, biogenesis complex. *Nat.*  
625 *Rev. Mol. Cell Biol.* 14: 759–774.
- 626 21. Mizushima, N., T. Yoshimori, and Y. Ohsumi. 2011. The Role of Atg Proteins in Autophagosome Formation. *Annu. Rev.*  
627 *Cell Dev. Biol.* 27: 107–132.
- 628 22. Mizushima, N., T. Noda, T. Yoshimori, Y. Tanaka, T. Ishii, M. D. George, D. J. Klionsky, M. Ohsumi, and Y. Ohsumi.  
629 1998. A protein conjugation system essential for autophagy. *Nature* 395: 395–398.
- 630 23. Wang, Y.-T., K. Zaitsev, Q. Lu, S. Li, W. T. Schaiff, K.-W. Kim, L. Droit, C. B. Wilen, C. Desai, D. R. Balce, R. C. Orchard, A.  
631 Orvedahl, S. Park, D. Kreamalmeyer, S. A. Handley, J. D. Pfeifer, M. T. Baldrige, M. N. Artyomov, C. L. Stallings, and H.  
632 W. Virgin. 2020. Select autophagy genes maintain quiescence of tissue-resident macrophages and increase susceptibility  
633 to *Listeria monocytogenes*. *Nat. Microbiol.* 5: 272–281.
- 634 24. Wang, Y.-T., A. Sansone, A. Smirnov, C. L. Stallings, and A. Orvedahl. 2022. Myeloid autophagy genes protect mice  
635 against fatal TNF- and LPS-induced cytokine storm syndromes. *Autophagy* 1–14.
- 636 25. Martinez, J., R. K. S. Malireddi, Q. Lu, L. D. Cunha, S. Pelletier, S. Gingras, R. Orchard, J.-L. Guan, H. Tan, J. Peng, T.-D.  
637 Kanneganti, H. W. Virgin, and D. R. Green. 2015. Molecular characterization of LC3-associated phagocytosis reveals  
638 distinct roles for Rubicon, NOX2 and autophagy proteins. *Nat. Cell Biol.* 17: 893–906.
- 639 26. Kitada, T., A. Pisani, D. R. Porter, H. Yamaguchi, A. Tschertter, G. Martella, P. Bonsi, C. Zhang, E. N. Pothos, and J. Shen.  
640 2007. Impaired dopamine release and synaptic plasticity in the striatum of *PINK1* -deficient mice. *Proc. Natl. Acad. Sci.*  
641 104: 11441–11446.
- 642 27. Goldberg, M. S., S. M. Fleming, J. J. Palacino, C. Cepeda, H. A. Lam, A. Bhatnagar, E. G. Meloni, N. Wu, L. C. Ackerson,  
643 G. J. Klapstein, M. Gajendiran, B. L. Roth, M.-F. Chesselet, N. T. Maidment, M. S. Levine, and J. Shen. 2003. Parkin-  
644 deficient Mice Exhibit Nigrostriatal Deficits but Not Loss of Dopaminergic Neurons. *J. Biol. Chem.* 278: 43628–43635.

- 645 28. Huynh, J. P., C.-C. Lin, J. M. Kimmey, N. N. Jarjour, E. A. Schwarzkopf, T. R. Bradstreet, I. Shchukina, O. Shpynov, C. T.  
646 Weaver, R. Taneja, M. N. Artyomov, B. T. Edelson, and C. L. Stallings. 2018. Bhlhe40 is an essential repressor of IL-10  
647 during *Mycobacterium tuberculosis* infection. *J. Exp. Med.* 215: 1823–1838.
- 648 29. Domingo-Gonzalez, R., S. Das, K. L. Griffiths, M. Ahmed, M. Bambouskova, R. Gopal, S. Gondi, M. Muñoz-Torrico, M.  
649 A. Salazar-Lezama, A. Cruz-Lagunas, L. Jiménez-Álvarez, G. Ramirez-Martinez, R. Espinosa-Soto, T. Sultana, J. Lyons-  
650 Weiler, T. A. Reinhart, J. Arcos, M. de la Luz Garcia-Hernandez, M. A. Mastrangelo, N. Al-Hammadi, R. Townsend, J.-M.  
651 Balada-Llasat, J. B. Torrelles, G. Kaplan, W. Horne, J. K. Kolls, M. N. Artyomov, J. Rangel-Moreno, J. Zúñiga, and S. A.  
652 Khader. 2017. Interleukin-17 limits hypoxia-inducible factor 1 $\alpha$  and development of hypoxic granulomas during  
653 tuberculosis. *JCI Insight* 2: e92973.
- 654 30. Martinez, J., L. D. Cunha, S. Park, M. Yang, Q. Lu, R. Orchard, Q.-Z. Li, M. Yan, L. Janke, C. Guy, A. Linkermann, H. W.  
655 Virgin, and D. R. Green. 2016. Noncanonical autophagy inhibits the autoinflammatory, lupus-like response to dying cells.  
656 *Nature* 533: 115–119.
- 657 31. Heckmann, B. L., and D. R. Green. 2019. LC3-associated phagocytosis at a glance. *J. Cell Sci.* 132: jcs231472.
- 658 32. Wan, J., E. Weiss, S. Ben Mkaddem, M. Mabire, P.-M. Choinier, O. Picq, T. Thibault-Sogorb, P. Hegde, D. Pishvaie, M.  
659 Bens, L. Broer, H. Gilgenkrantz, R. Moreau, L. Saveanu, P. Codogno, R. C. Monteiro, and S. Lotersztajn. 2020. LC3-  
660 associated phagocytosis protects against inflammation and liver fibrosis via immunoreceptor inhibitory signaling. *Sci.*  
661 *Transl. Med.* 12: eaaw8523.
- 662 33. Sanjuan, M. A., C. P. Dillon, S. W. G. Tait, S. Moshiah, F. Dorsey, S. Connell, M. Komatsu, K. Tanaka, J. L. Cleveland, S.  
663 Withoff, and D. R. Green. 2007. Toll-like receptor signalling in macrophages links the autophagy pathway to  
664 phagocytosis. *Nature* 450: 1253–1257.
- 665 34. Martinez, J., J. Almendinger, A. Oberst, R. Ness, C. P. Dillon, P. Fitzgerald, M. O. Hengartner, and D. R. Green. 2011.  
666 Microtubule-associated protein 1 light chain 3 alpha (LC3)-associated phagocytosis is required for the efficient clearance  
667 of dead cells. *Proc. Natl. Acad. Sci.* 108: 17396–17401.
- 668 35. Cohen, S. B., B. H. Gern, J. L. Delahaye, K. N. Adams, C. R. Plumlee, J. K. Winkler, D. R. Sherman, M. Y. Gerner, and K.  
669 B. Urdahl. 2018. Alveolar Macrophages Provide an Early *Mycobacterium tuberculosis* Niche and Initiate Dissemination.  
670 *Cell Host Microbe* 24: 439-446.e4.
- 671 36. Rothchild, A. C., G. S. Olson, J. Nemeth, L. M. Amon, D. Mai, E. S. Gold, A. H. Diercks, and A. Aderem. 2019. Alveolar  
672 macrophages generate a noncanonical NRF2-driven transcriptional response to *Mycobacterium tuberculosis* in vivo. *Sci.*  
673 *Immunol.* 4: eaaw6693.
- 674 37. Vieira, S., H. Lemos, R. Grespan, M. Napimoga, D. Dal-Secco, A. Freitas, T. Cunha, W. V. Jr, D. Souza-Junior, M. Jamur,  
675 K. Fernandes, C. Oliver, J. Silva, M. Teixeira, and F. Cunha. 2009. A crucial role for TNF- $\alpha$  in mediating neutrophil influx  
676 induced by endogenously generated or exogenous chemokines, KC/CXCL1 and LIX/CXCL5. *Br. J. Pharmacol.* 11.
- 677 38. Bendall, L. J., and K. F. Bradstock. 2014. G-CSF: From granulopoietic stimulant to bone marrow stem cell mobilizing  
678 agent. *Cytokine Growth Factor Rev.* 25: 355–367.
- 679 39. Semerad, C. L., F. Liu, A. D. Gregory, K. Stumpf, and D. C. Link. 2002. G-CSF Is an Essential Regulator of Neutrophil  
680 Trafficking from the Bone Marrow to the Blood. *Immunity* 17: 413–423.
- 681 40. Pollara, G., C. T. Turner, J. Rosenheim, A. Chandran, L. C. K. Bell, A. Khan, A. Patel, L. F. Peralta, A. Folino, A. Akarca, C.  
682 Venturini, T. Baker, S. Ecker, F. L. M. Ricciardolo, T. Marafioti, C. Ugarte-Gil, D. A. J. Moore, B. M. Chain, G. S. Tomlinson,  
683 and M. Noursadeghi. 2021. Exaggerated IL-17A activity in human in vivo recall responses discriminates active  
684 tuberculosis from latent infection and cured disease. *Sci. Transl. Med.* 13: eabg7673.

- 685 41. Sasaki, Y., Y.-M. Guo, T. Goto, K. Ubukawa, K. Asanuma, I. Kobayashi, K. Sawada, H. Wakui, and N. Takahashi. 2021.  
686 IL-6 Generated from Human Hematopoietic Stem and Progenitor Cells through TLR4 Signaling Promotes Emergency  
687 Granulopoiesis by Regulating Transcription Factor Expression. *J. Immunol.* ji2100168.
- 688 42. Hu, S., W. He, X. Du, J. Yang, Q. Wen, X.-P. Zhong, and L. Ma. 2017. IL-17 Production of Neutrophils Enhances  
689 Antibacteria Ability but Promotes Arthritis Development During Mycobacterium tuberculosis Infection. *EBioMedicine* 23:  
690 88–99.
- 691 43. Fielding, C. A., R. M. McLoughlin, L. McLeod, C. S. Colmont, M. Najdovska, D. Grail, M. Ernst, S. A. Jones, N. Topley,  
692 and B. J. Jenkins. 2008. IL-6 Regulates Neutrophil Trafficking during Acute Inflammation via STAT3. *J. Immunol.* 181:  
693 2189–2195.
- 694 44. Saitoh, T., and S. Akira. 2016. Regulation of inflammasomes by autophagy. *J. Allergy Clin. Immunol.* 138: 28–36.
- 695 45. Harris, J., M. Hartman, C. Roche, S. G. Zeng, A. O’Shea, F. A. Sharp, E. M. Lambe, E. M. Creagh, D. T. Golenbock, J.  
696 Tschopp, H. Kornfeld, K. A. Fitzgerald, and E. C. Lavelle. 2011. Autophagy Controls IL-1 $\beta$  Secretion by Targeting Pro-IL-1 $\beta$   
697 for Degradation. *J. Biol. Chem.* 286: 9587–9597.
- 698 46. Ko, J. H., S.-O. Yoon, H. J. Lee, and J. Y. Oh. 2017. Rapamycin regulates macrophage activation by inhibiting NLRP3  
699 inflammasome-p38 MAPK-NF $\kappa$ B pathways in autophagy- and p62-dependent manners. *Oncotarget* 8: 40817–40831.
- 700 47. Shi, C.-S., K. Shenderov, N.-N. Huang, J. Kabat, M. Abu-Asab, K. A. Fitzgerald, A. Sher, and J. H. Kehrl. 2012. Activation  
701 of autophagy by inflammatory signals limits IL-1 $\beta$  production by targeting ubiquitinated inflammasomes for destruction.  
702 *Nat. Immunol.* 13: 255–263.
- 703 48. Pyrillou, K., L. C. Burzynski, and M. C. H. Clarke. 2020. Alternative Pathways of IL-1 Activation, and Its Role in Health  
704 and Disease. *Front. Immunol.* 11: 613170.
- 705 49. McElvania TeKippe, E., I. C. Allen, P. D. Hulseberg, J. T. Sullivan, J. R. McCann, M. Sandor, M. Braunstein, and J. P.-Y.  
706 Ting. 2010. Granuloma Formation and Host Defense in Chronic Mycobacterium tuberculosis Infection Requires  
707 PYCARD/ASC but Not NLRP3 or Caspase-1. *PLoS ONE* 5: e12320.
- 708 50. Beckwith, K. S., M. S. Beckwith, S. Ullmann, R. S. Sætra, H. Kim, A. Marstad, S. E. Åsberg, T. A. Strand, M. Haug, M.  
709 Niederweis, H. A. Stenmark, and T. H. Flo. 2020. Plasma membrane damage causes NLRP3 activation and pyroptosis  
710 during Mycobacterium tuberculosis infection. *Nat. Commun.* 11: 2270.
- 711 51. Abdalla, H., L. Srinivasan, S. Shah, K. D. Mayer-Barber, A. Sher, F. S. Sutterwala, and V. Briken. 2012. Mycobacterium  
712 tuberculosis Infection of Dendritic Cells Leads to Partially Caspase-1/11-Independent IL-1 $\beta$  and IL-18 Secretion but Not to  
713 Pyroptosis. *PLoS ONE* 7: e40722.
- 714 52. Mayer-Barber, K. D., D. L. Barber, K. Shenderov, S. D. White, M. S. Wilson, A. Cheever, D. Kugler, S. Hieny, P. Caspar,  
715 G. Núñez, D. Schlueter, R. A. Flavell, F. S. Sutterwala, and A. Sher. 2010. Cutting Edge: Caspase-1 Independent IL-1 $\beta$   
716 Production Is Critical for Host Resistance to *Mycobacterium tuberculosis* and Does Not Require TLR Signaling In Vivo. *J.*  
717 *Immunol.* 184: 3326–3330.
- 718 53. Lin, K.-M., W. Hu, T. D. Troutman, M. Jennings, T. Brewer, X. Li, S. Nanda, P. Cohen, J. A. Thomas, and C. Pasare.  
719 2014. IRAK-1 bypasses priming and directly links TLRs to rapid NLRP3 inflammasome activation. *Proc. Natl. Acad. Sci.*  
720 111: 775–780.
- 721 54. Yu Qiao, Peng Wang, Gianni Qi, Lei Zhang, Chengjiang Gao. 2016. TLR-induced NF- $\kappa$ B activation regulates NLRP3  
722 expression in murine macrophages. 2012: 1022–1026.
- 723 55. Lazarou, M., D. A. Sliter, L. A. Kane, S. A. Sarraf, C. Wang, J. L. Burman, D. P. Sideris, A. I. Fogel, and R. J. Youle. 2015.  
724 The ubiquitin kinase PINK1 recruits autophagy receptors to induce mitophagy. *Nature* 524: 309–314.

- 725 56. Killackey, S. A., D. J. Philpott, and S. E. Girardin. 2020. Mitophagy pathways in health and disease. *J. Cell Biol.* 219:  
726 e202004029.
- 727 57. Zhang, W., H. Ren, C. Xu, C. Zhu, H. Wu, D. Liu, J. Wang, L. Liu, W. Li, Q. Ma, L. Du, M. Zheng, C. Zhang, J. Liu, and Q.  
728 Chen. 2016. Hypoxic mitophagy regulates mitochondrial quality and platelet activation and determines severity of I/R  
729 heart injury. *eLife* 5: e21407.
- 730 58. Wang, S., S. M. Martin, P. S. Harris, and C. M. Knudson. 2011. Caspase Inhibition Blocks Cell Death and Enhances  
731 Mitophagy but Fails to Promote T-Cell Lymphoma. *PLoS ONE* 6: e19786.
- 732 59. Nguyen, T. N., B. S. Padman, and M. Lazarou. 2016. Deciphering the Molecular Signals of PINK1/Parkin Mitophagy.  
733 *Trends Cell Biol.* 26: 733–744.
- 734 60. Harris, J., N. Deen, S. Zamani, and M. A. Hasnat. 2018. Mitophagy and the release of inflammatory cytokines.  
735 *Mitochondrion* 41: 2–8.
- 736 61. Song, Y., Y. Zhou, and X. Zhou. 2020. The role of mitophagy in innate immune responses triggered by mitochondrial  
737 stress. *Cell Commun. Signal.* 18: 186.
- 738 62. Griffin, G. K., G. Newton, M. L. Tarrío, D. Bu, E. Maganto-Garcia, V. Azcutia, P. Alcaide, N. Gräbie, F. W. Luscinskas, K.  
739 J. Croce, and A. H. Lichtman. 2012. IL-17 and TNF- $\alpha$  Sustain Neutrophil Recruitment during Inflammation through  
740 Synergistic Effects on Endothelial Activation. *J. Immunol.* 188: 6287–6299.
- 741 63. Roussel, L., F. Houle, C. Chan, Y. Yao, J. Bérubé, R. Olivenstein, J. G. Martin, J. Huot, Q. Hamid, L. Ferri, and S.  
742 Rousseau. 2010. IL-17 Promotes p38 MAPK-Dependent Endothelial Activation Enhancing Neutrophil Recruitment to Sites  
743 of Inflammation. *J. Immunol.* 184: 4531–4537.
- 744 64. Halwani, R., S. Al-Muhsen, and Q. Hamid. 2013. T Helper 17 Cells in Airway Diseases. *Chest* 143: 494–501.
- 745 65. Pittman, K., and P. Kubes. 2013. Damage-Associated Molecular Patterns Control Neutrophil Recruitment. *J. Innate*  
746 *Immun.* 5: 315–323.
- 747 66. Tang, D., R. Kang, C. B. Coyne, H. J. Zeh, and M. T. Lotze. 2012. PAMPs and DAMPs: signal 0s that spur autophagy and  
748 immunity. *Immunol. Rev.* 249: 158–175.
- 749 67. Moretti, J., S. Roy, D. Bozec, J. Martinez, J. R. Chapman, B. Ueberheide, D. W. Lamming, Z. J. Chen, T. Horng, G.  
750 Yeretsian, D. R. Green, and J. M. Blander. 2017. STING Senses Microbial Viability to Orchestrate Stress-Mediated  
751 Autophagy of the Endoplasmic Reticulum. *Cell* 171: 809-823.e13.
- 752 68. Chipurupalli, S., U. Samavedam, and N. Robinson. 2021. Crosstalk Between ER Stress, Autophagy and Inflammation.  
753 *Front. Med.* 8: 758311.
- 754 69. Niven, J., N. Madelon, N. Page, A. Caruso, G. Harlé, S. Lemeille, C. A. Seemayer, S. Hugues, and M. Gannagé. 2019.  
755 Macroautophagy in Dendritic Cells Controls the Homeostasis and Stability of Regulatory T Cells. *Cell Rep.* 28: 21-29.e6.
- 756 70. Peral de Castro, C., S. A. Jones, C. Ní Cheallaigh, C. A. Hearnden, L. Williams, J. Winter, E. C. Lavelle, K. H. G. Mills, and  
757 J. Harris. 2012. Autophagy Regulates IL-23 Secretion and Innate T Cell Responses through Effects on IL-1 Secretion. *J.*  
758 *Immunol.* 189: 4144–4153.
- 759 71. Cho, M.-L., J.-W. Kang, Y.-M. Moon, H.-J. Nam, J.-Y. Jhun, S.-B. Heo, H.-T. Jin, S.-Y. Min, J.-H. Ju, K.-S. Park, Y.-G. Cho,  
760 C.-H. Yoon, S.-H. Park, Y.-C. Sung, and H.-Y. Kim. 2006. STAT3 and NF- $\kappa$ B Signal Pathway Is Required for IL-23-Mediated  
761 IL-17 Production in Spontaneous Arthritis Animal Model IL-1 Receptor Antagonist-Deficient Mice. *J. Immunol.* 176: 5652–  
762 5661.

763 72. Sutton, C., C. Brereton, B. Keogh, K. H. G. Mills, and E. C. Lavelle. 2006. A crucial role for interleukin (IL)-1 in the  
764 induction of IL-17–producing T cells that mediate autoimmune encephalomyelitis. *J. Exp. Med.* 203: 1685–1691.  
765

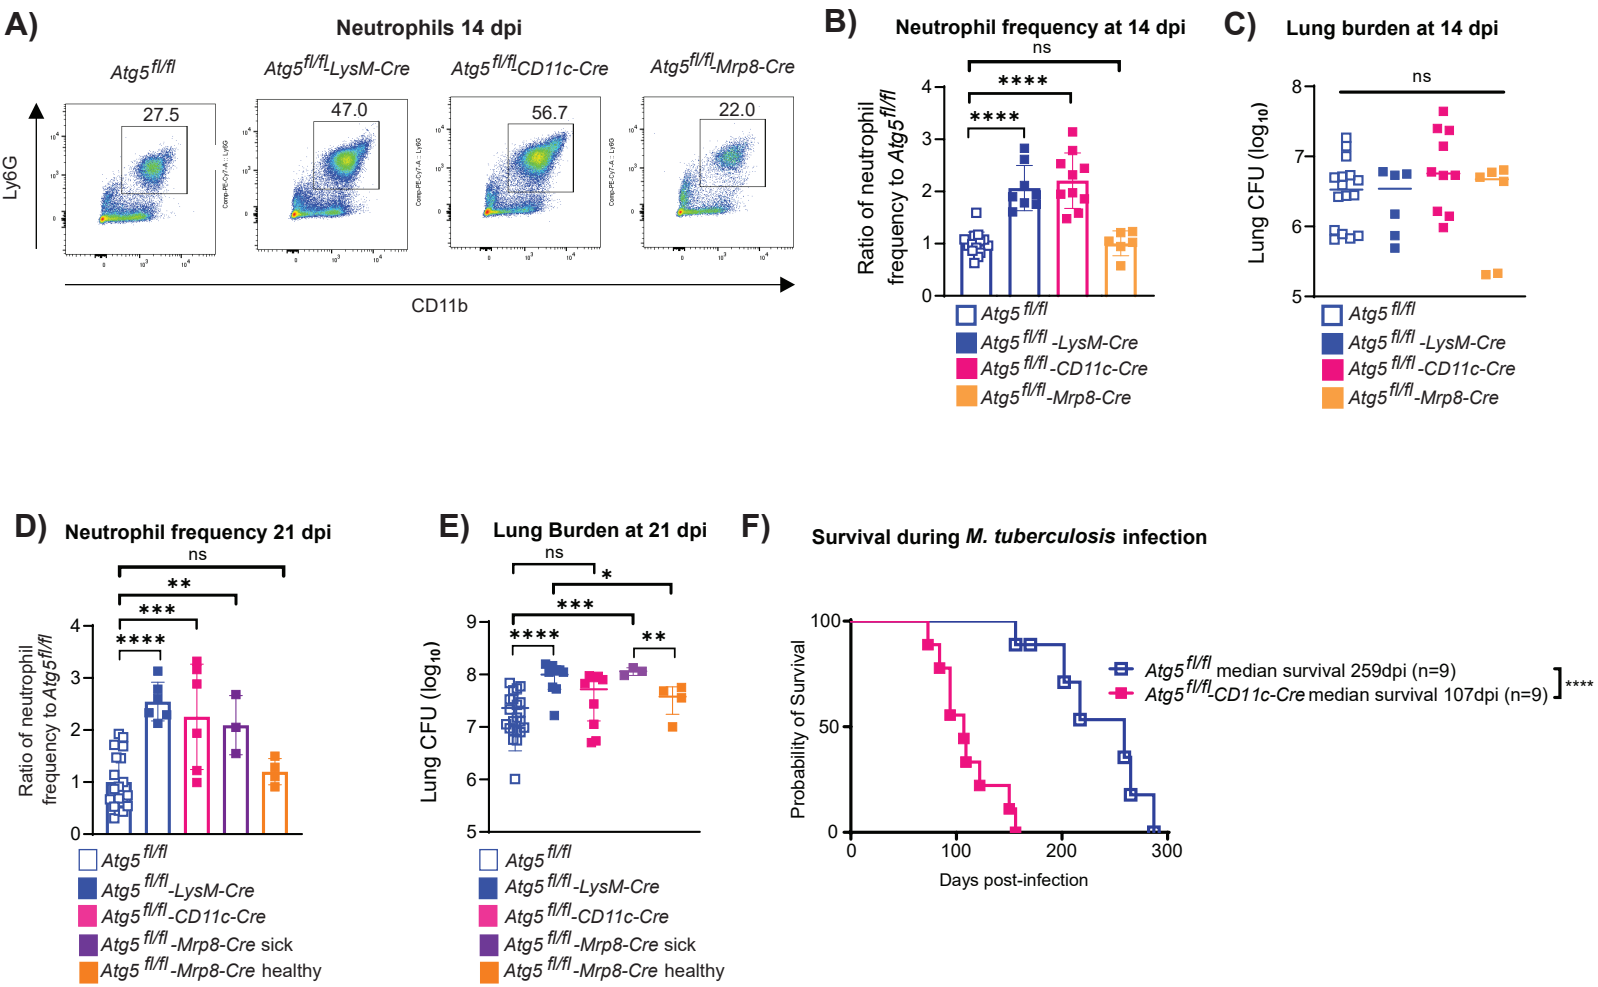

Figure 2.

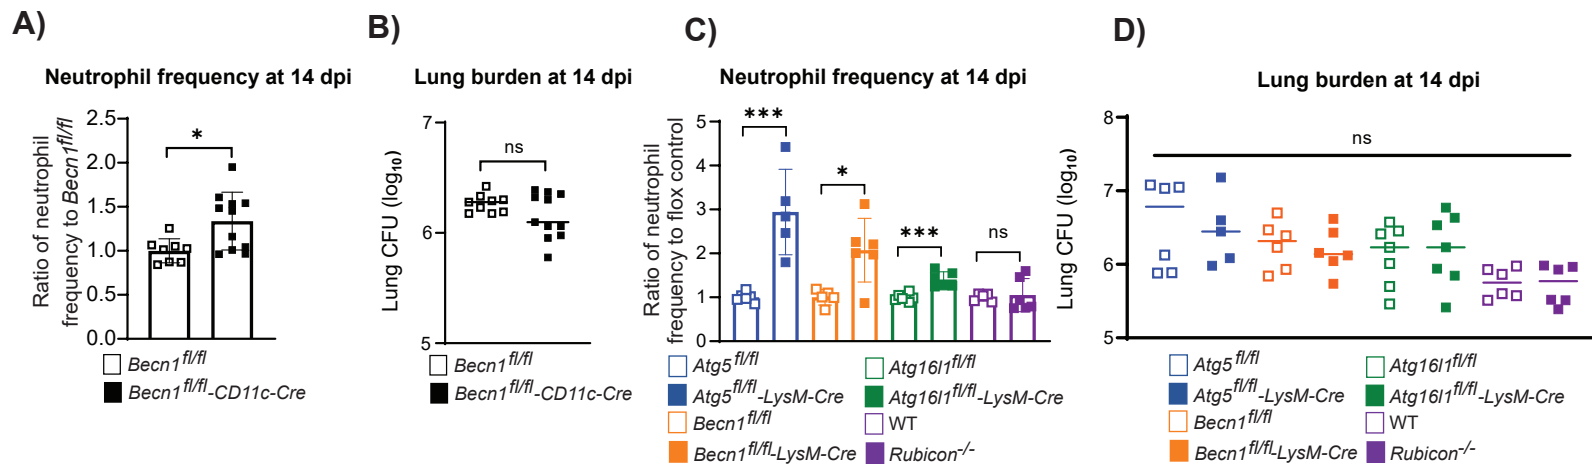

■ *Atg5<sup>fl/fl</sup>*-LysM-Cre ■ *Atg1611<sup>fl/fl</sup>*-LysM-Cre ■ *Becn1<sup>fl/fl</sup>*-LysM-Cre

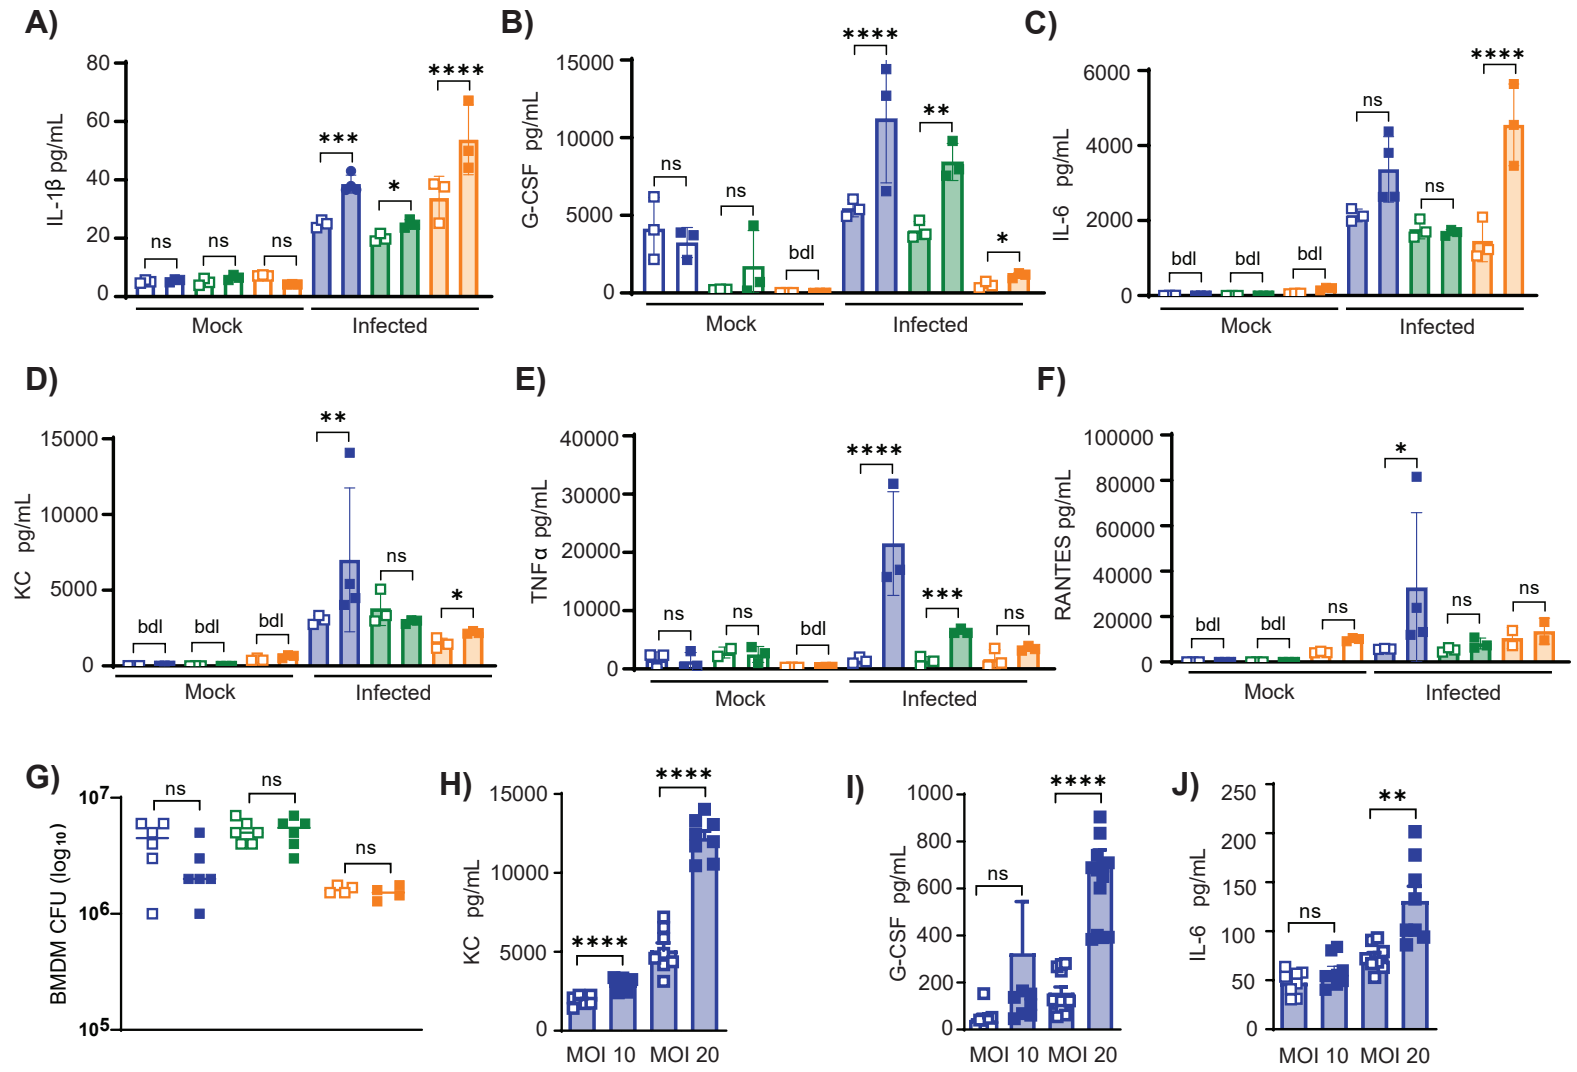



Figure 4.

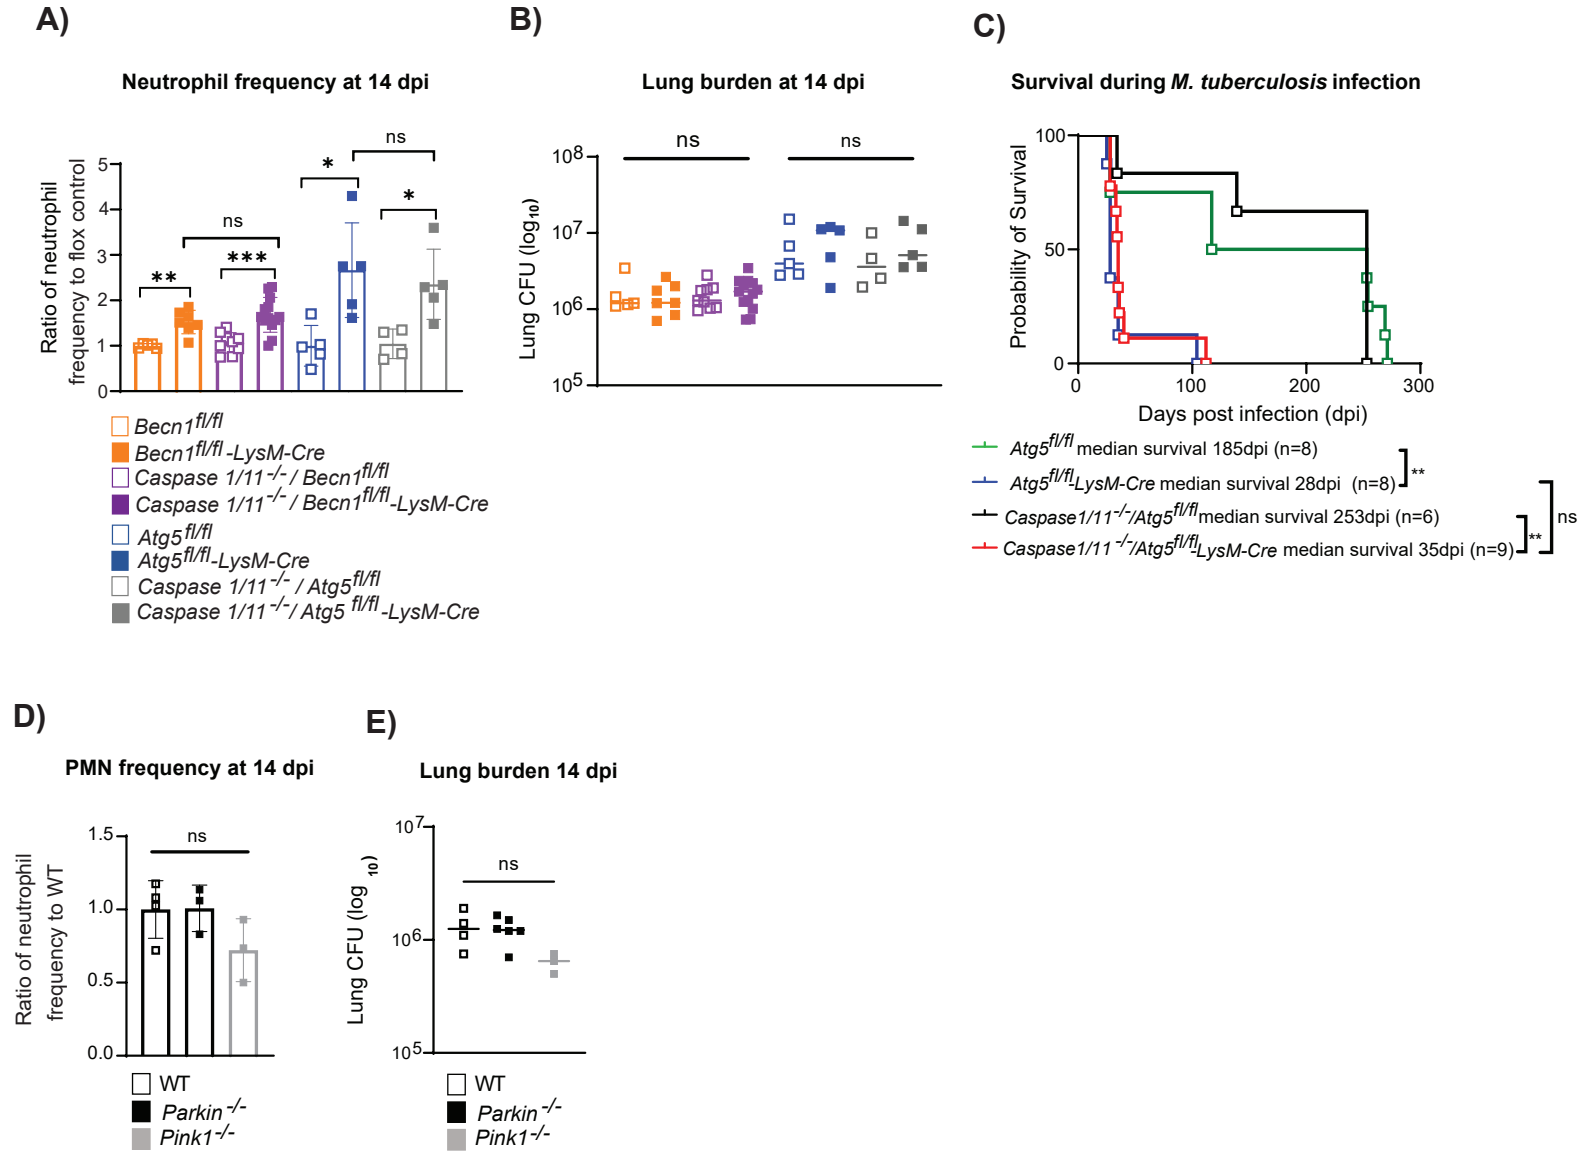

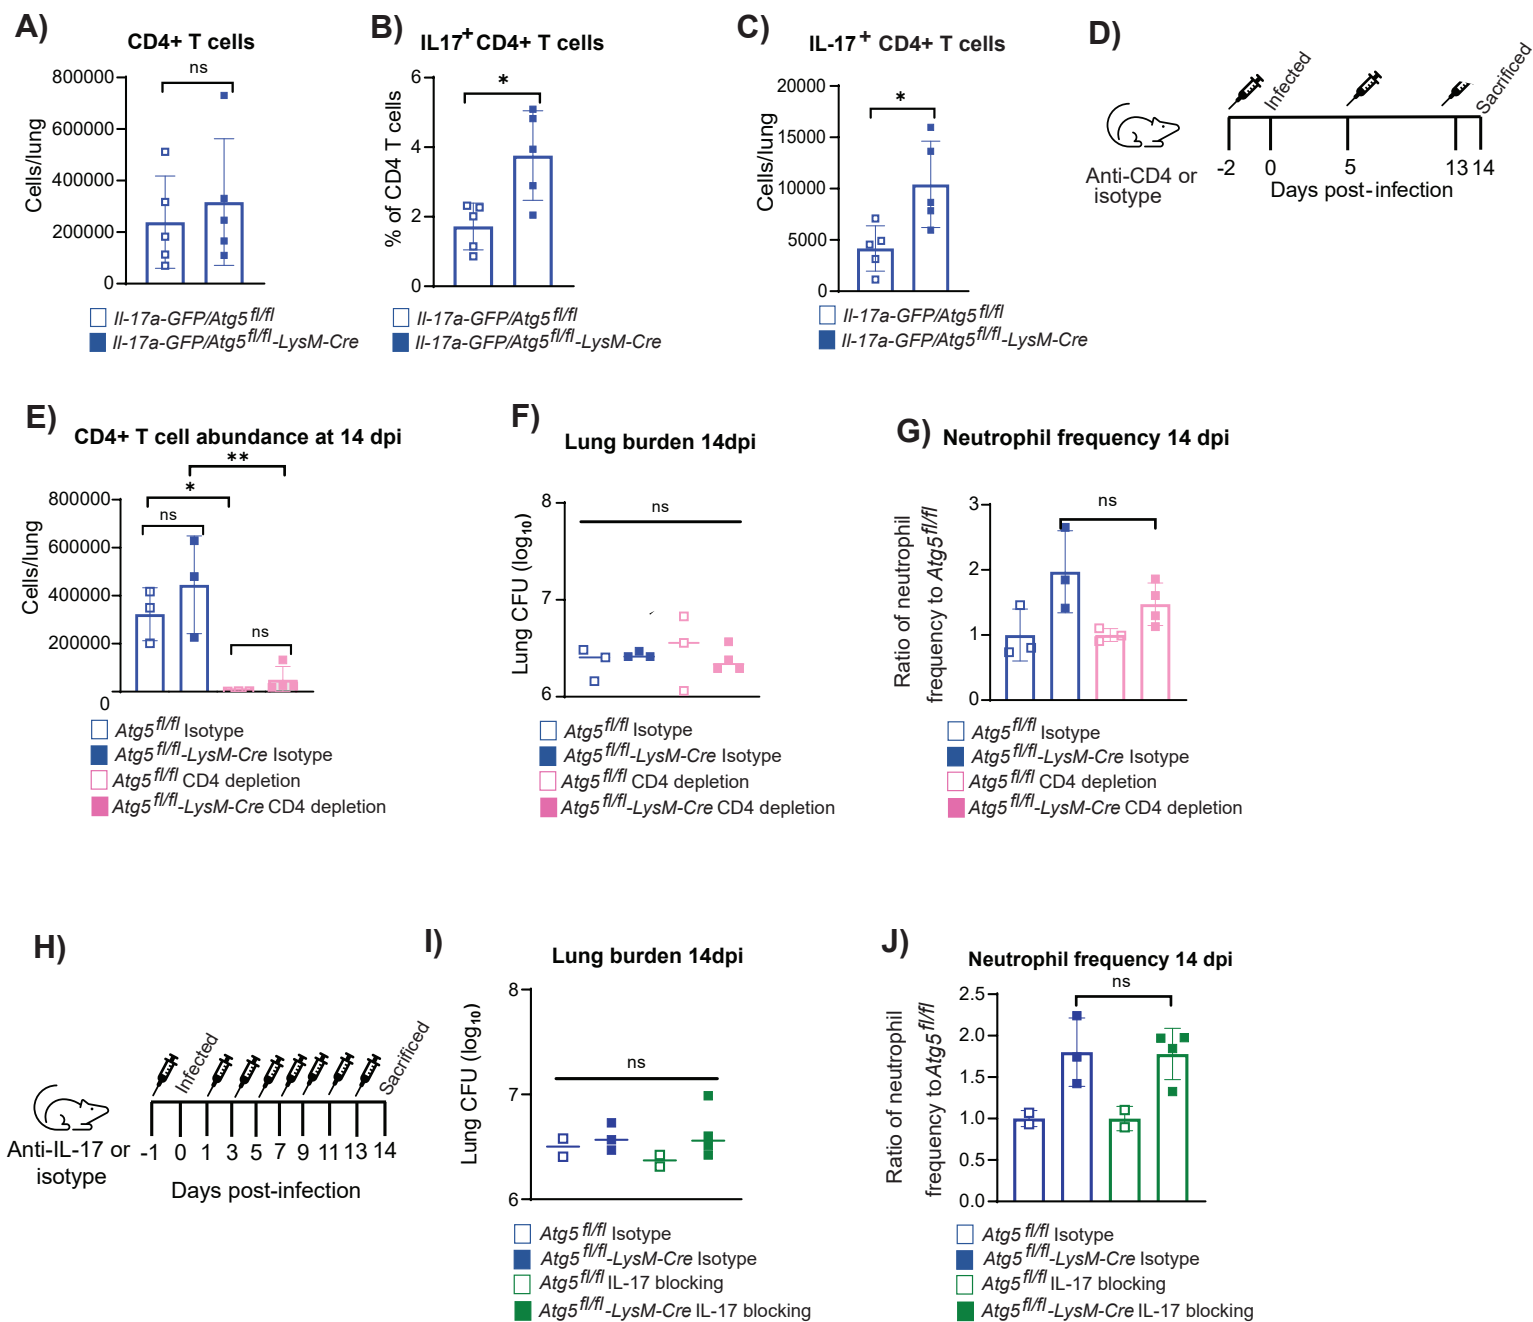

Source: https://www.biorxiv.org/content/10.1101/2022.11.04.515221v1.full.pdf
